# Supplementary material for: New terpenoids from the fermentation broth of the edible mushroom Cyclocybe aegerita
Source: PubMed Central journal article supplement (PMC6541320; doi:10.3762/bjoc.15.98), 2019-04-30
Supplement: Beilstein_J_Org_Chem-15-1000-s001.pdf [file Beilstein_J_Org_Chem-15-1000-s001.pdf]

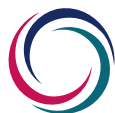

## Supporting Information

for

### **New terpenoids from the fermentation broth of the edible mushroom *Cyclocybe aegerita***

Frank Surup, Florian Hennicke, Nadine Sella, Maria Stroot, Steffen Bernecker, Sebastian Pfütze, Marc Stadler and Martin Rühl

*Beilstein J. Org. Chem.* **2019**, *15*, 1000–1007. [doi:10.3762/bjoc.15.98](https://doi.org/10.3762/bjoc.15.98)

**$^1\text{H}$  and  $^{13}\text{C}$  NMR spectra of compound 1 and  $^1\text{H}$ ,  $^{13}\text{C}$ , COSY, ROESY, HSQC and HMBC NMR spectra of compounds 2–4**

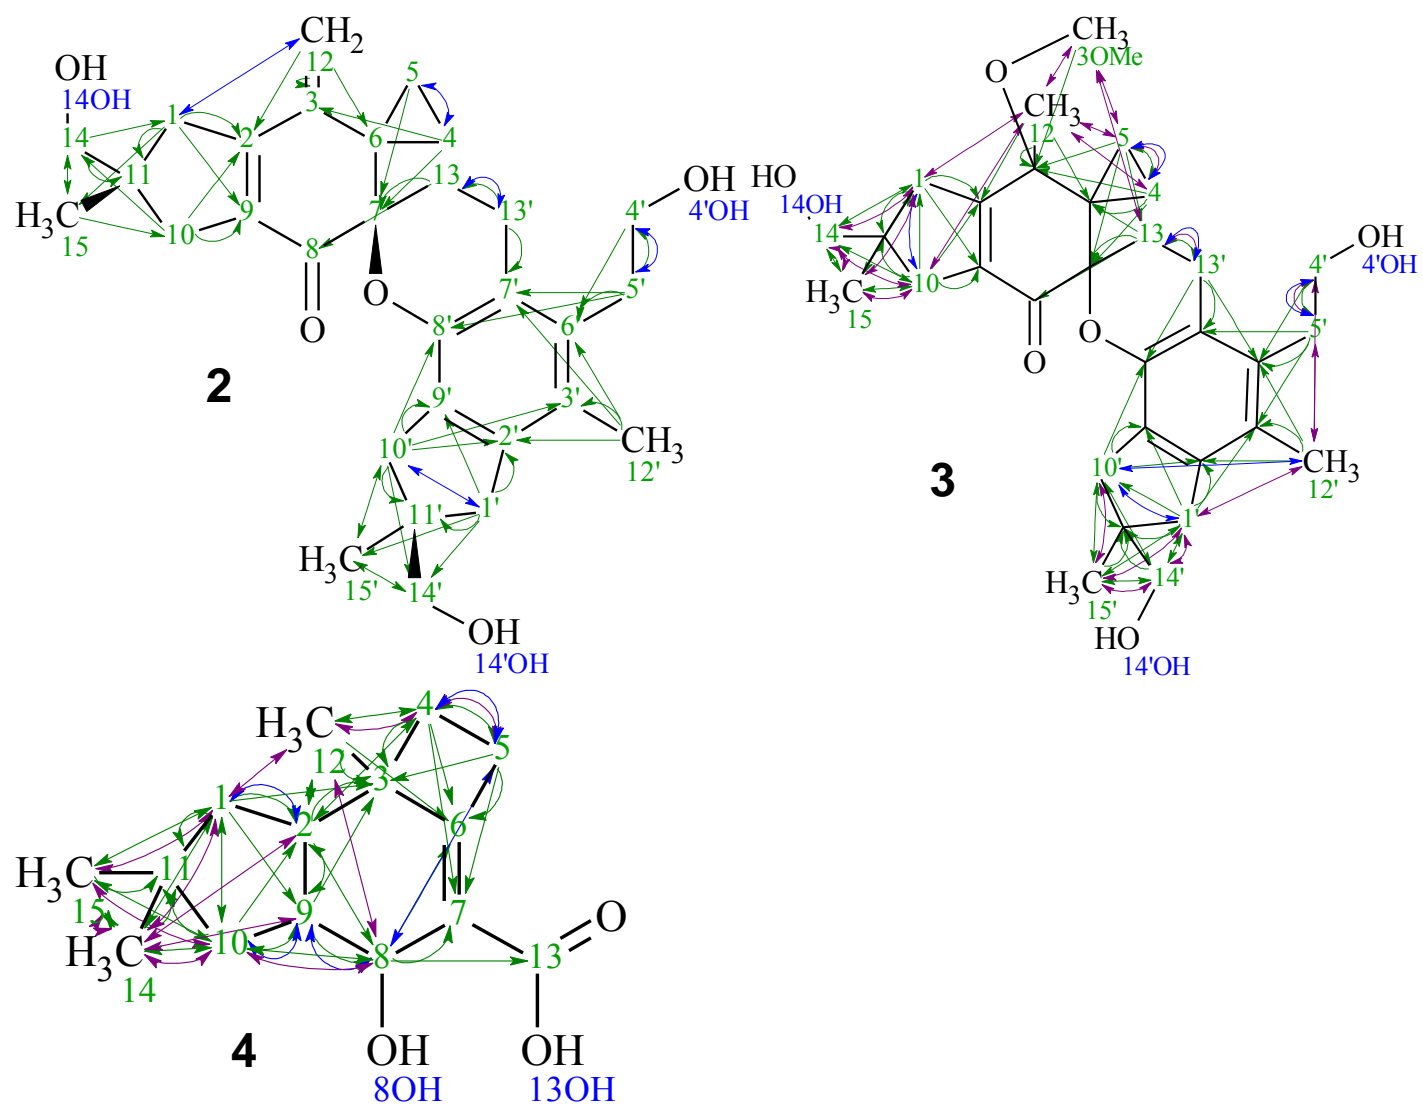

Figure S1. COSY (blue arrows), HMBC (green arrows) and ROESY (violet arrows) correlations indicating the structures of **2–4**.

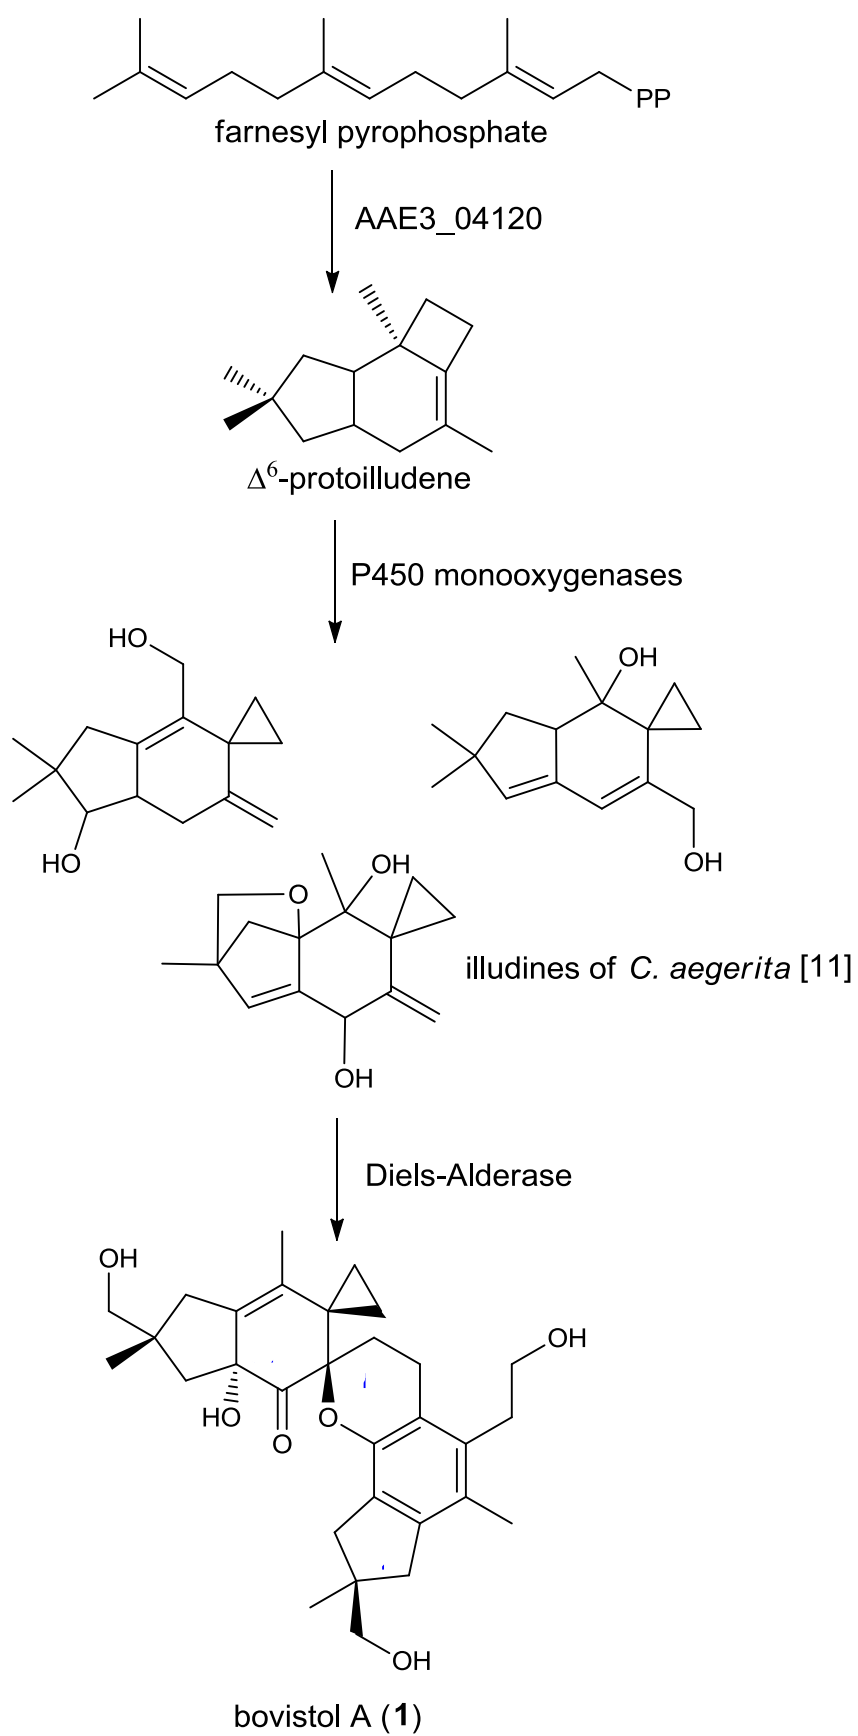

Figure S2. Proposed pathway for production of **1** in *C. aegerita*.

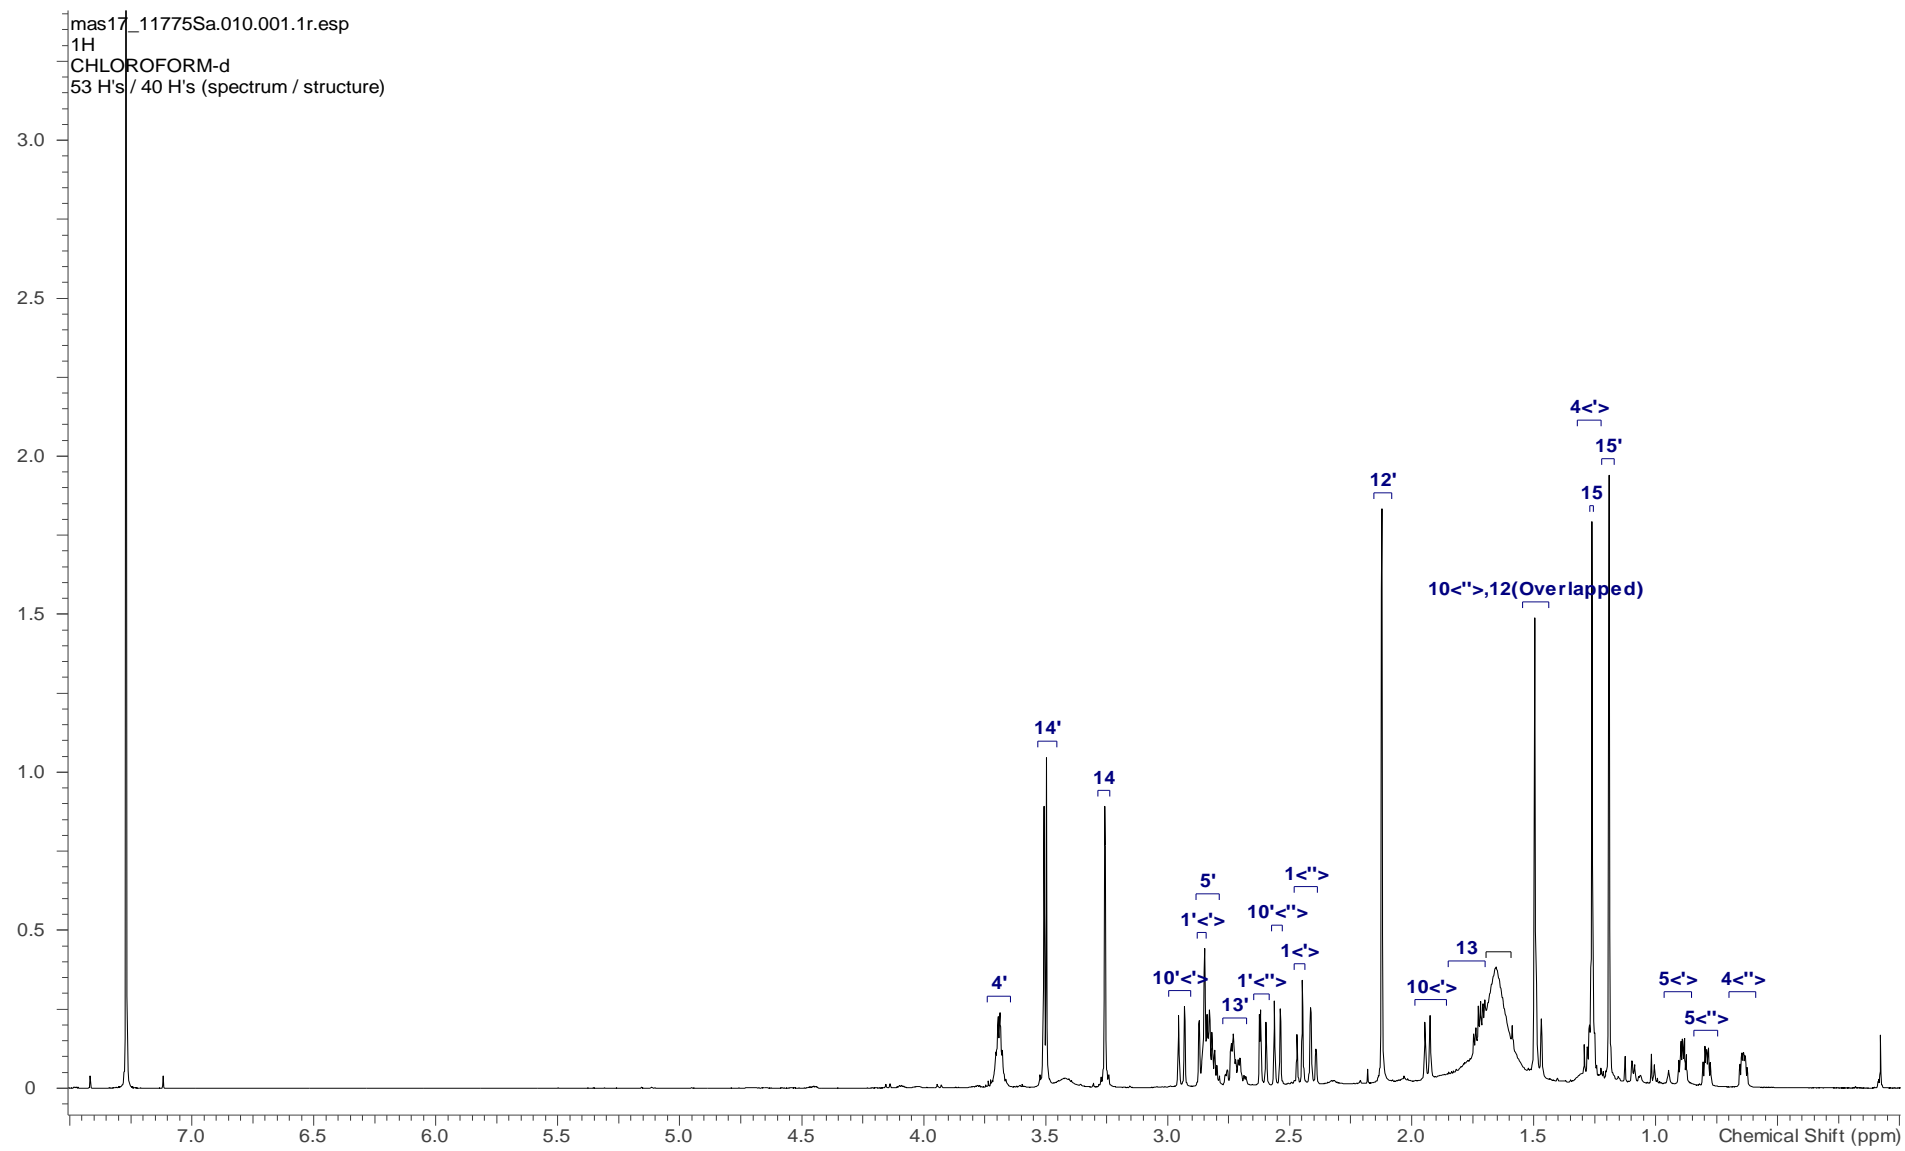

$^1\text{H}$  NMR spectrum of **1** (700 MHz,  $\text{CDCl}_3$ ).

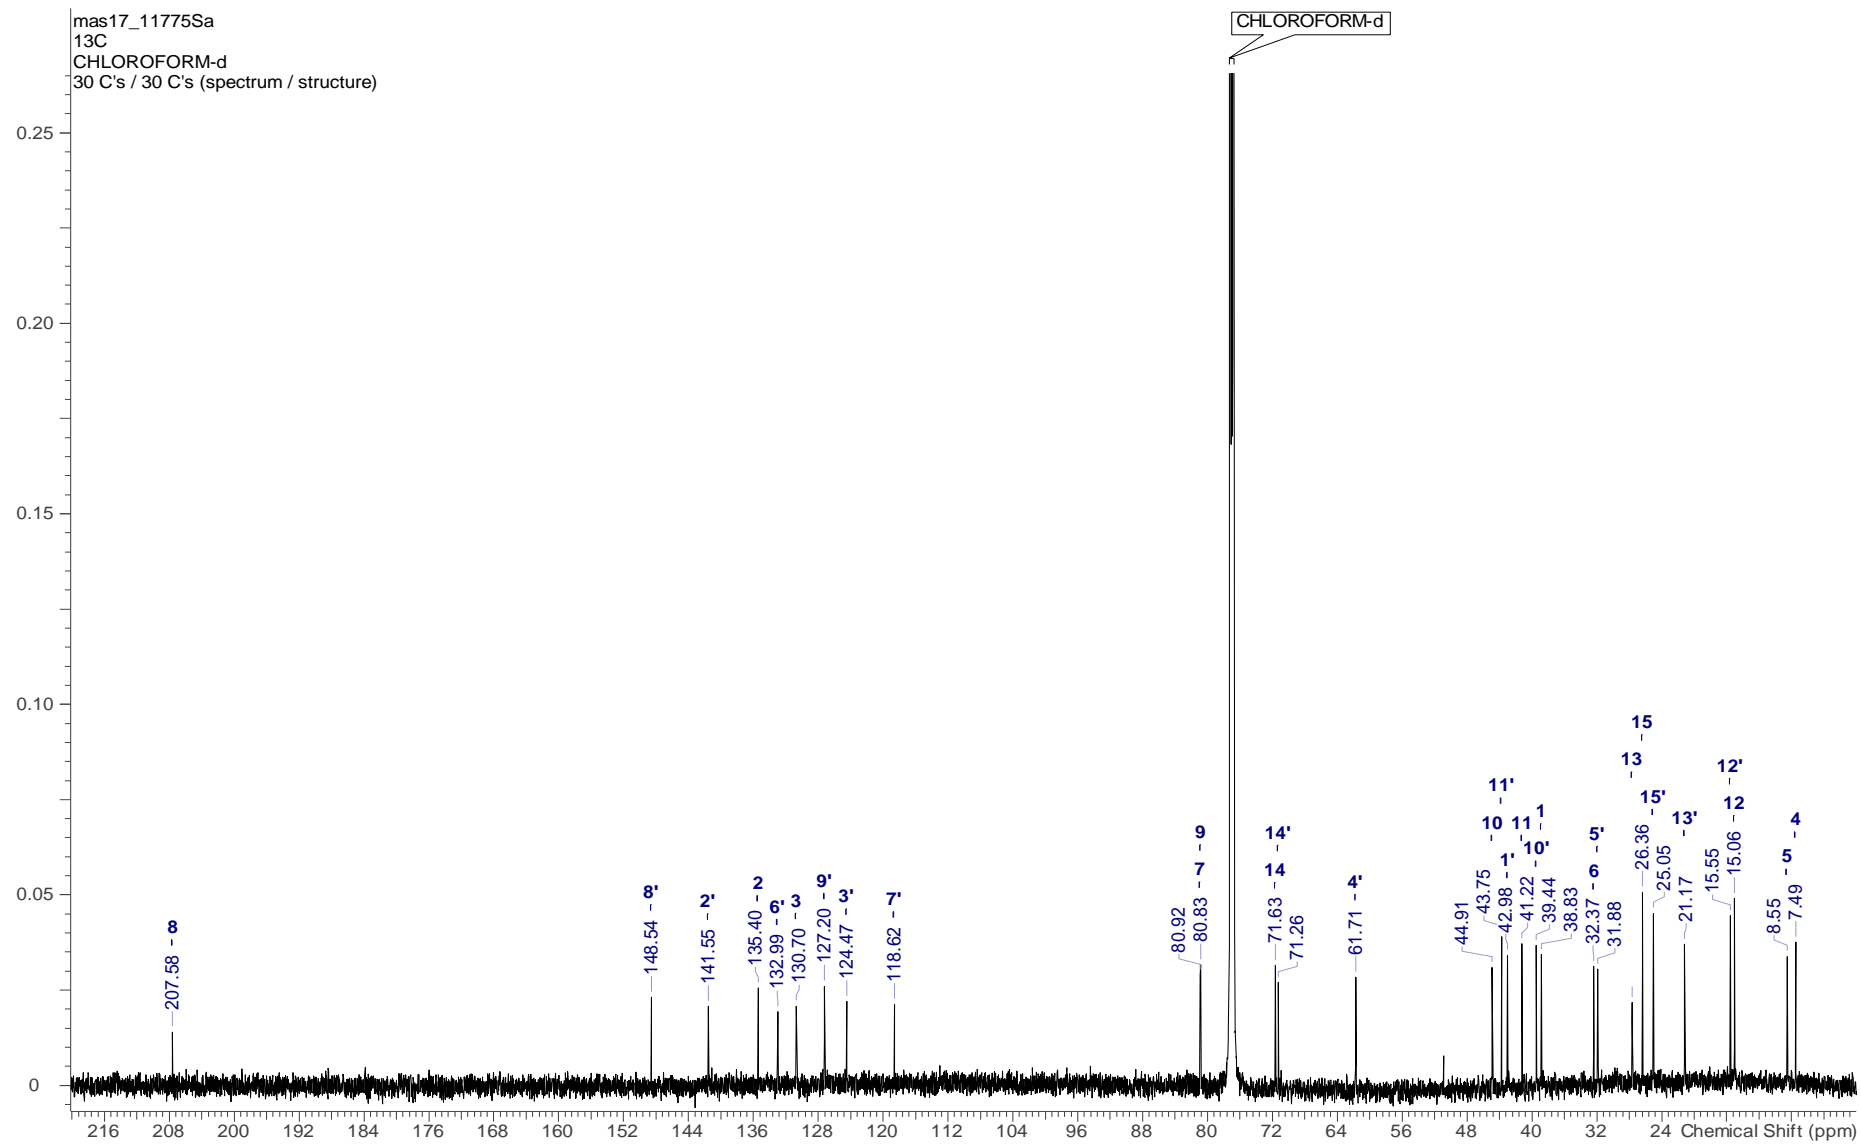

<sup>13</sup>C NMR spectrum of **1** (175 MHz, CDCl<sub>3</sub>).

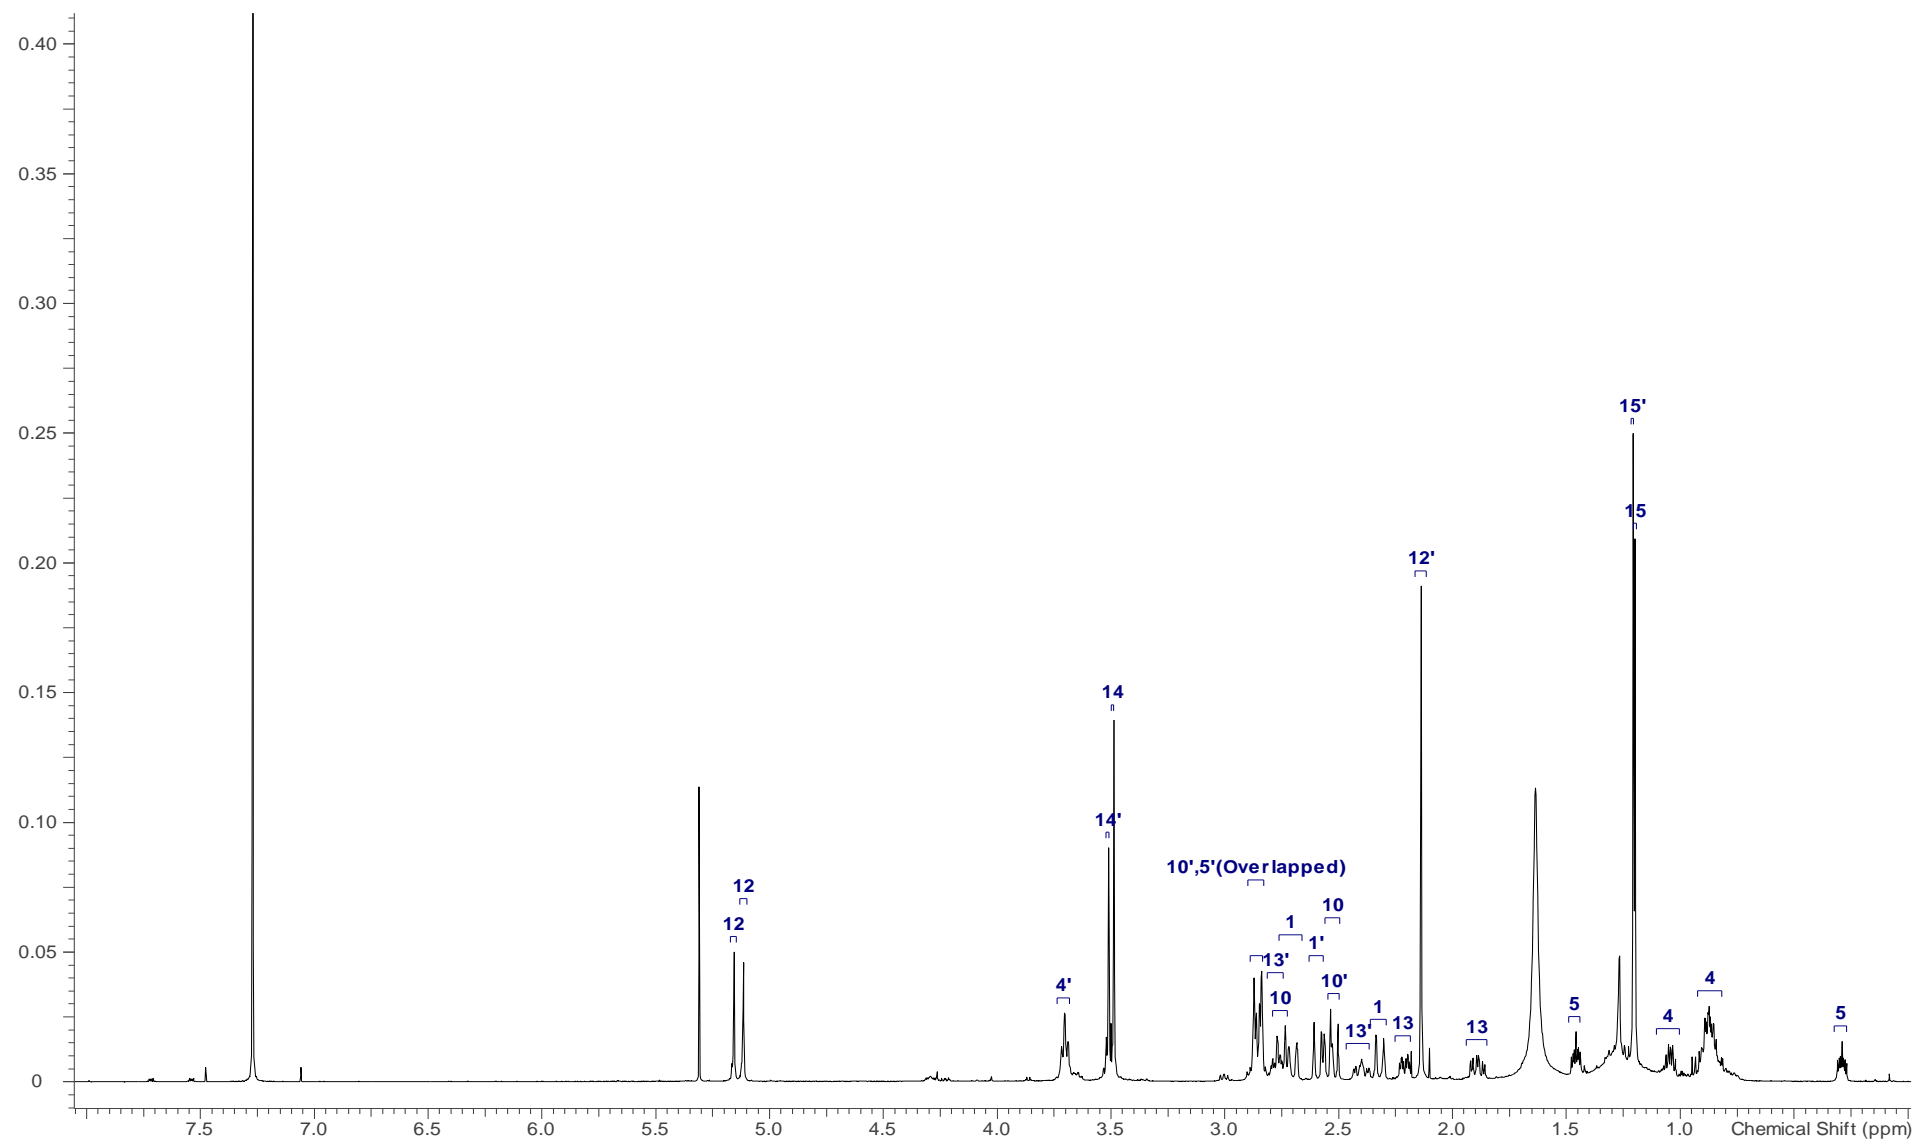

$^1\text{H}$  NMR spectrum of **2** (700 MHz,  $\text{CDCl}_3$ ).

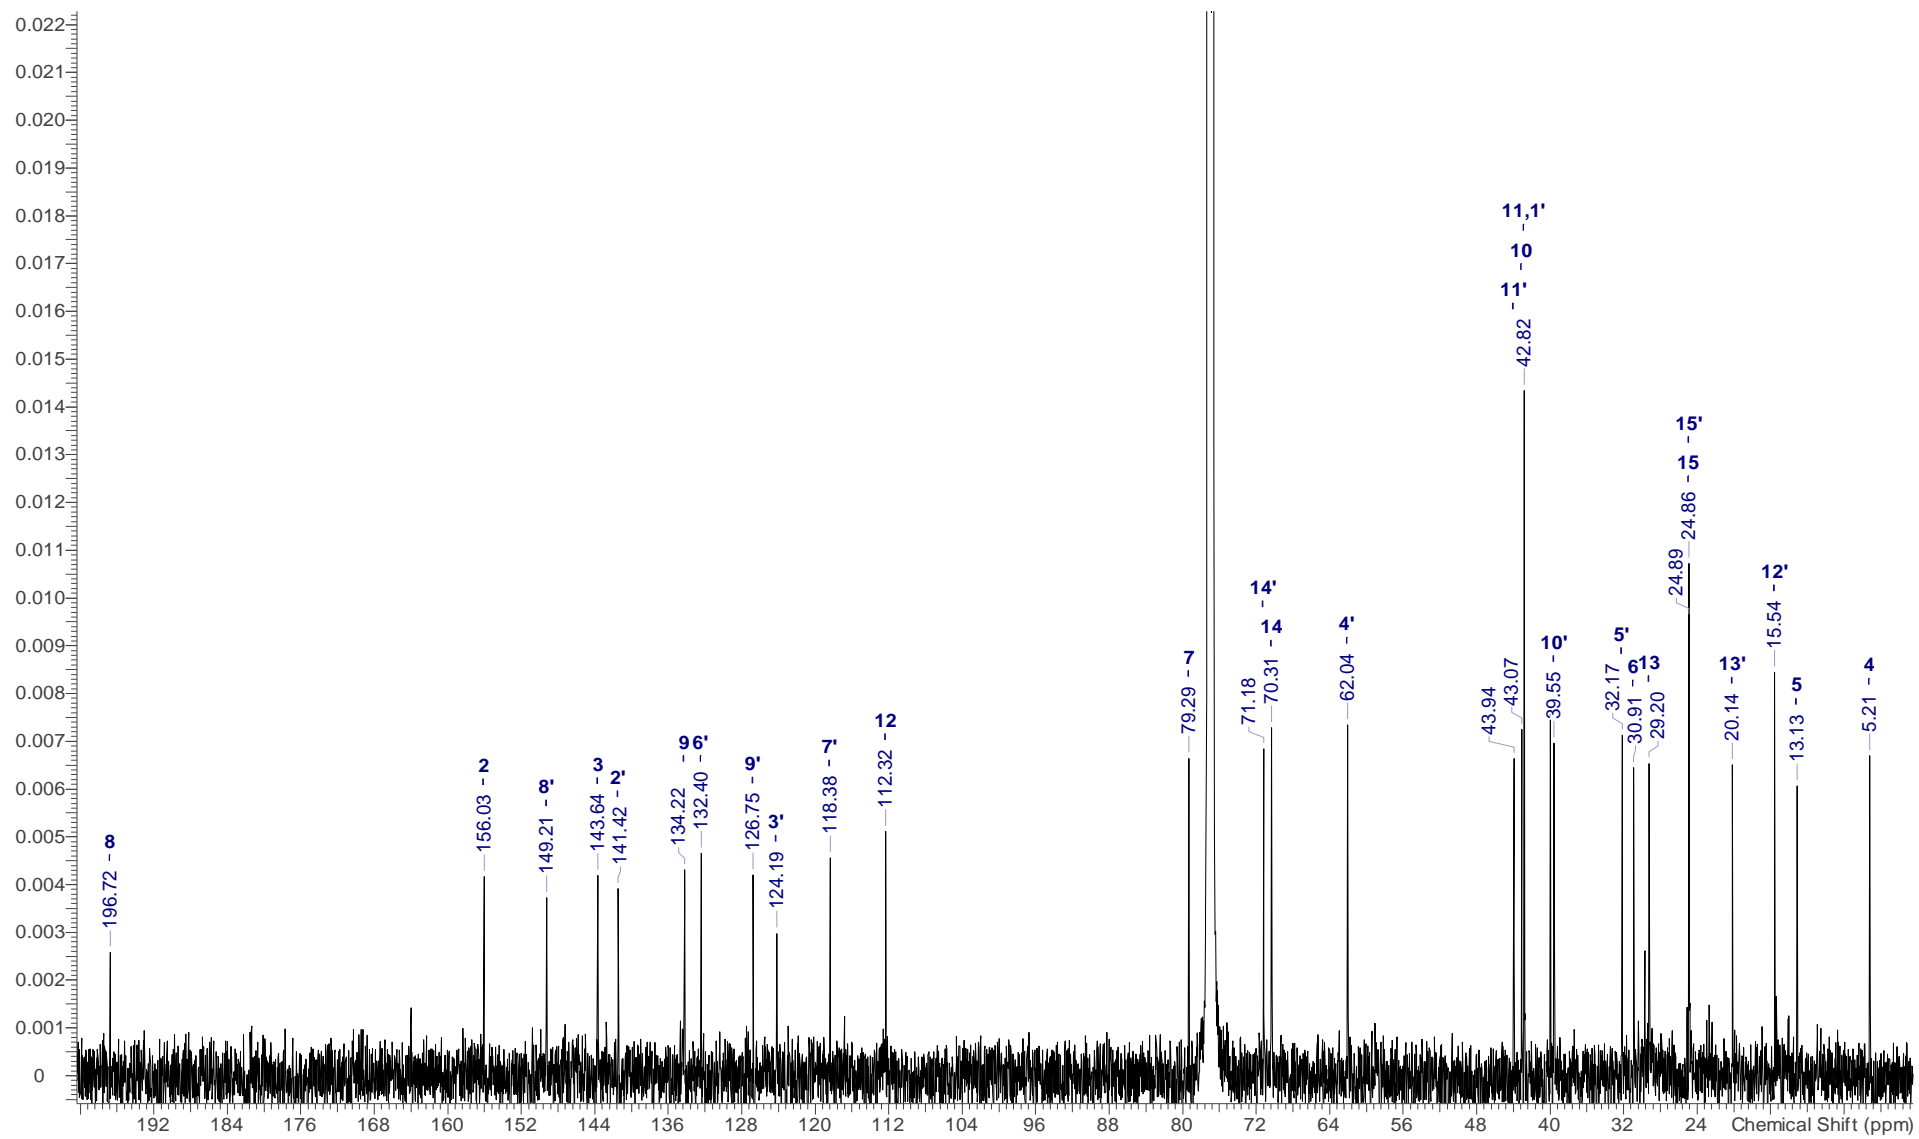

$^{13}\text{C}$  NMR spectrum of **2** (175 MHz,  $\text{CDCl}_3$ ).

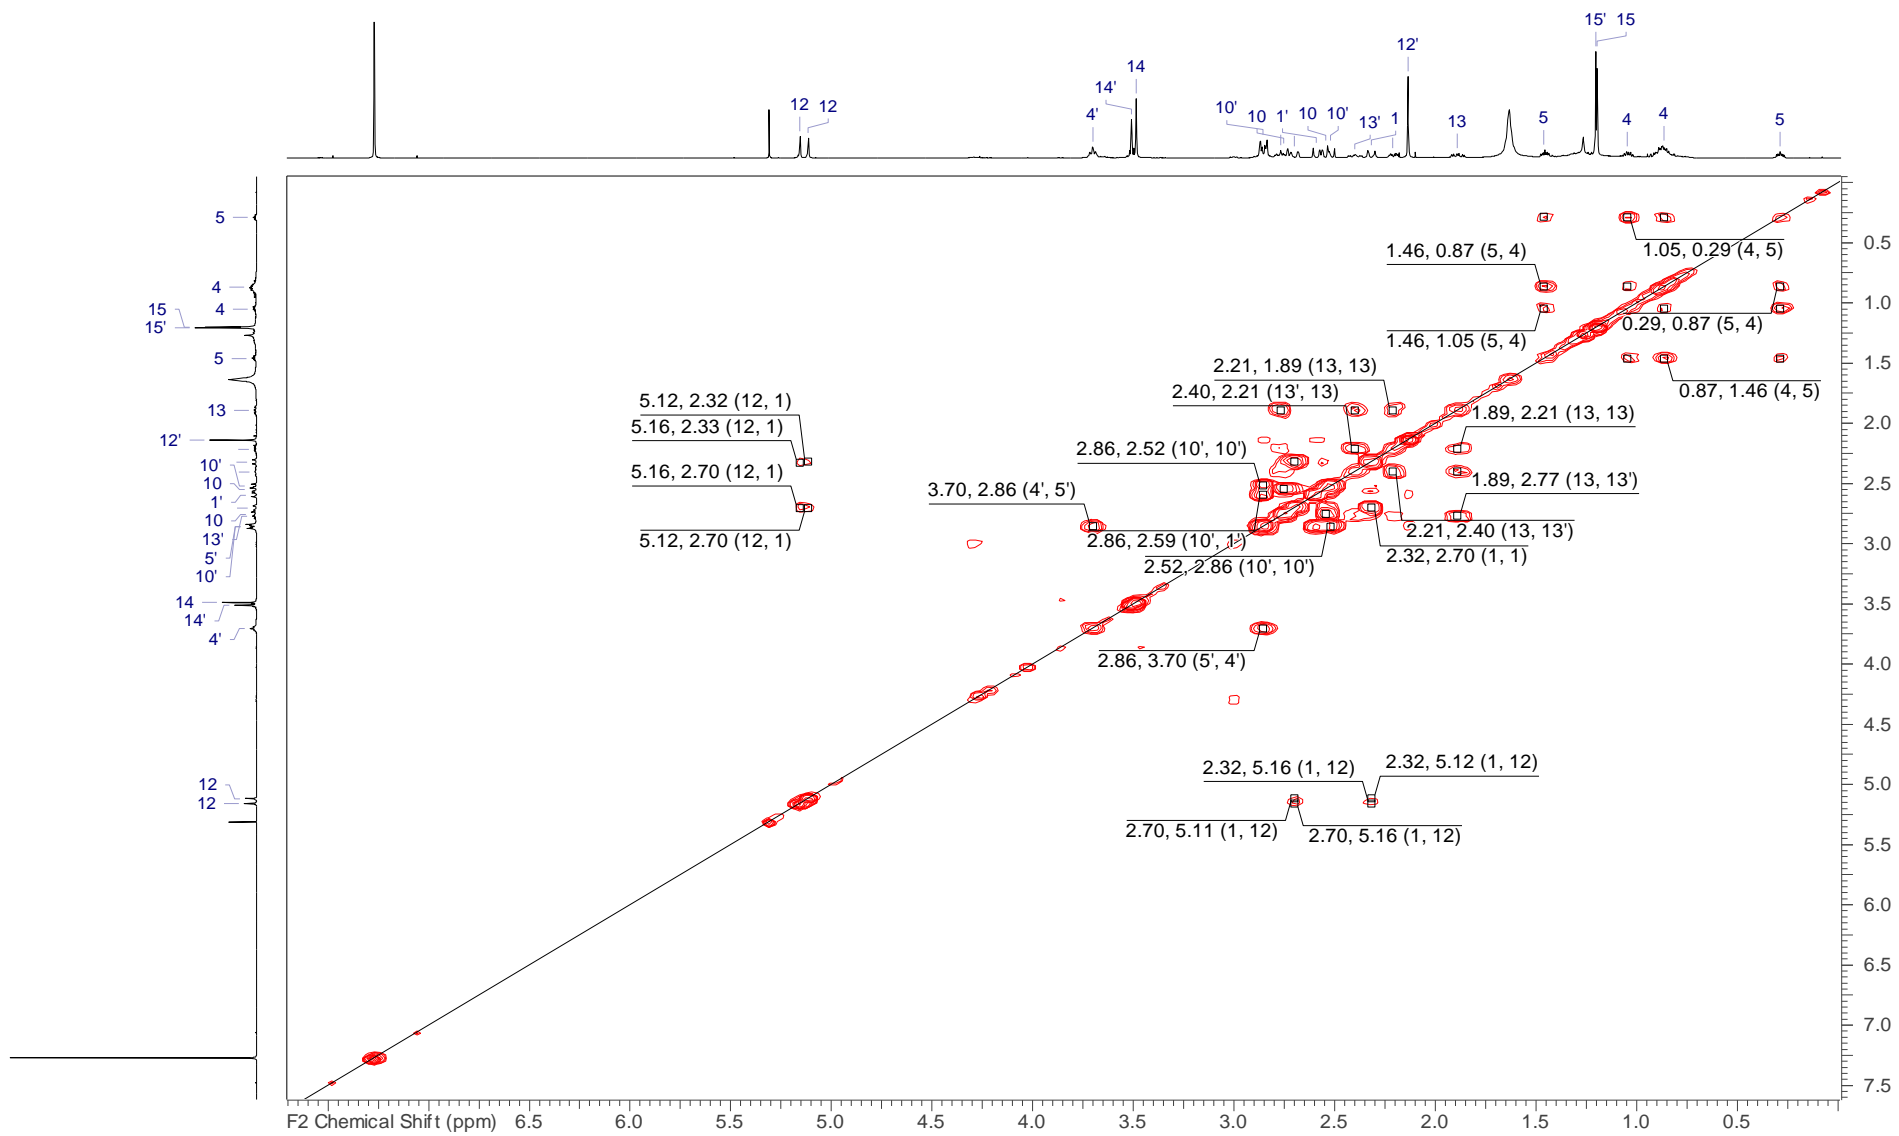

COSY NMR spectrum of **2** (700 MHz, CDCl<sub>3</sub>).



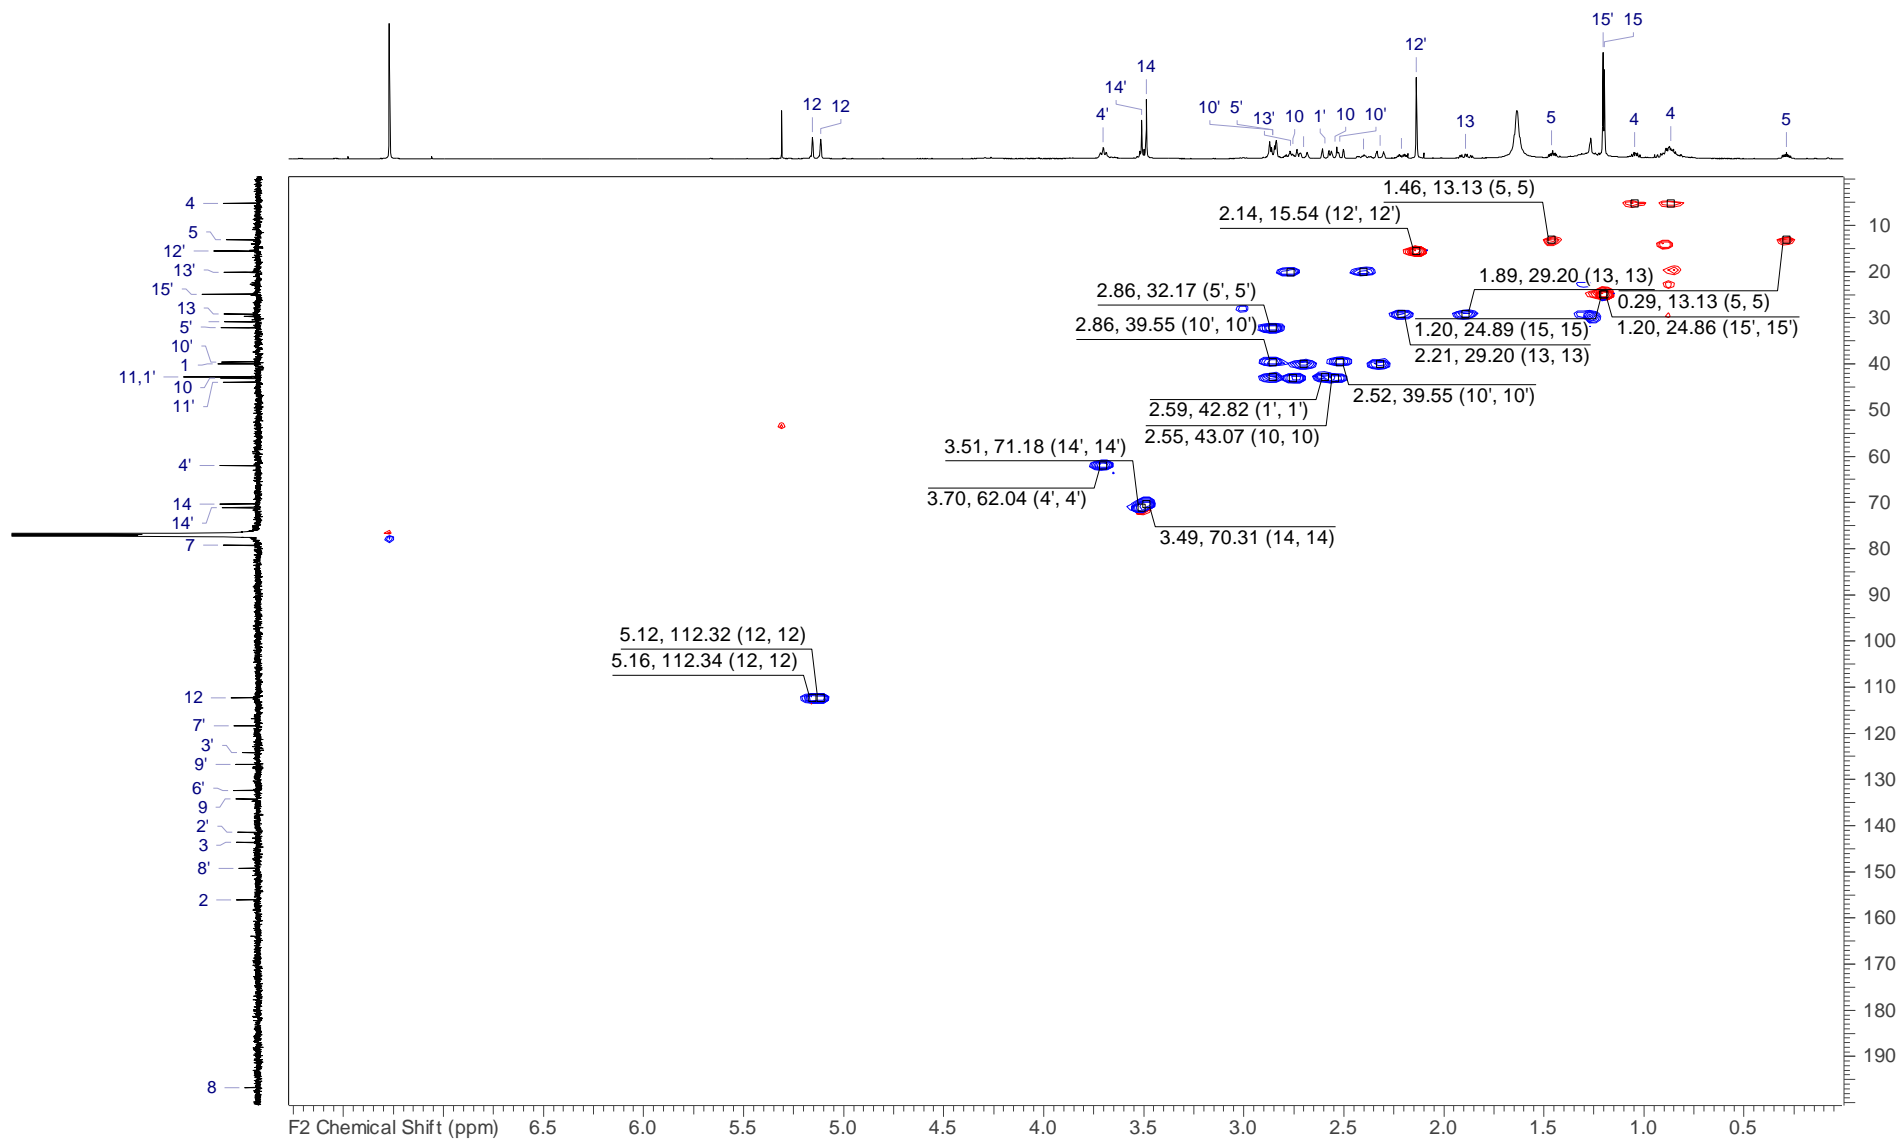

HSQC NMR spectrum of **2** (700 MHz, CDCl<sub>3</sub>).

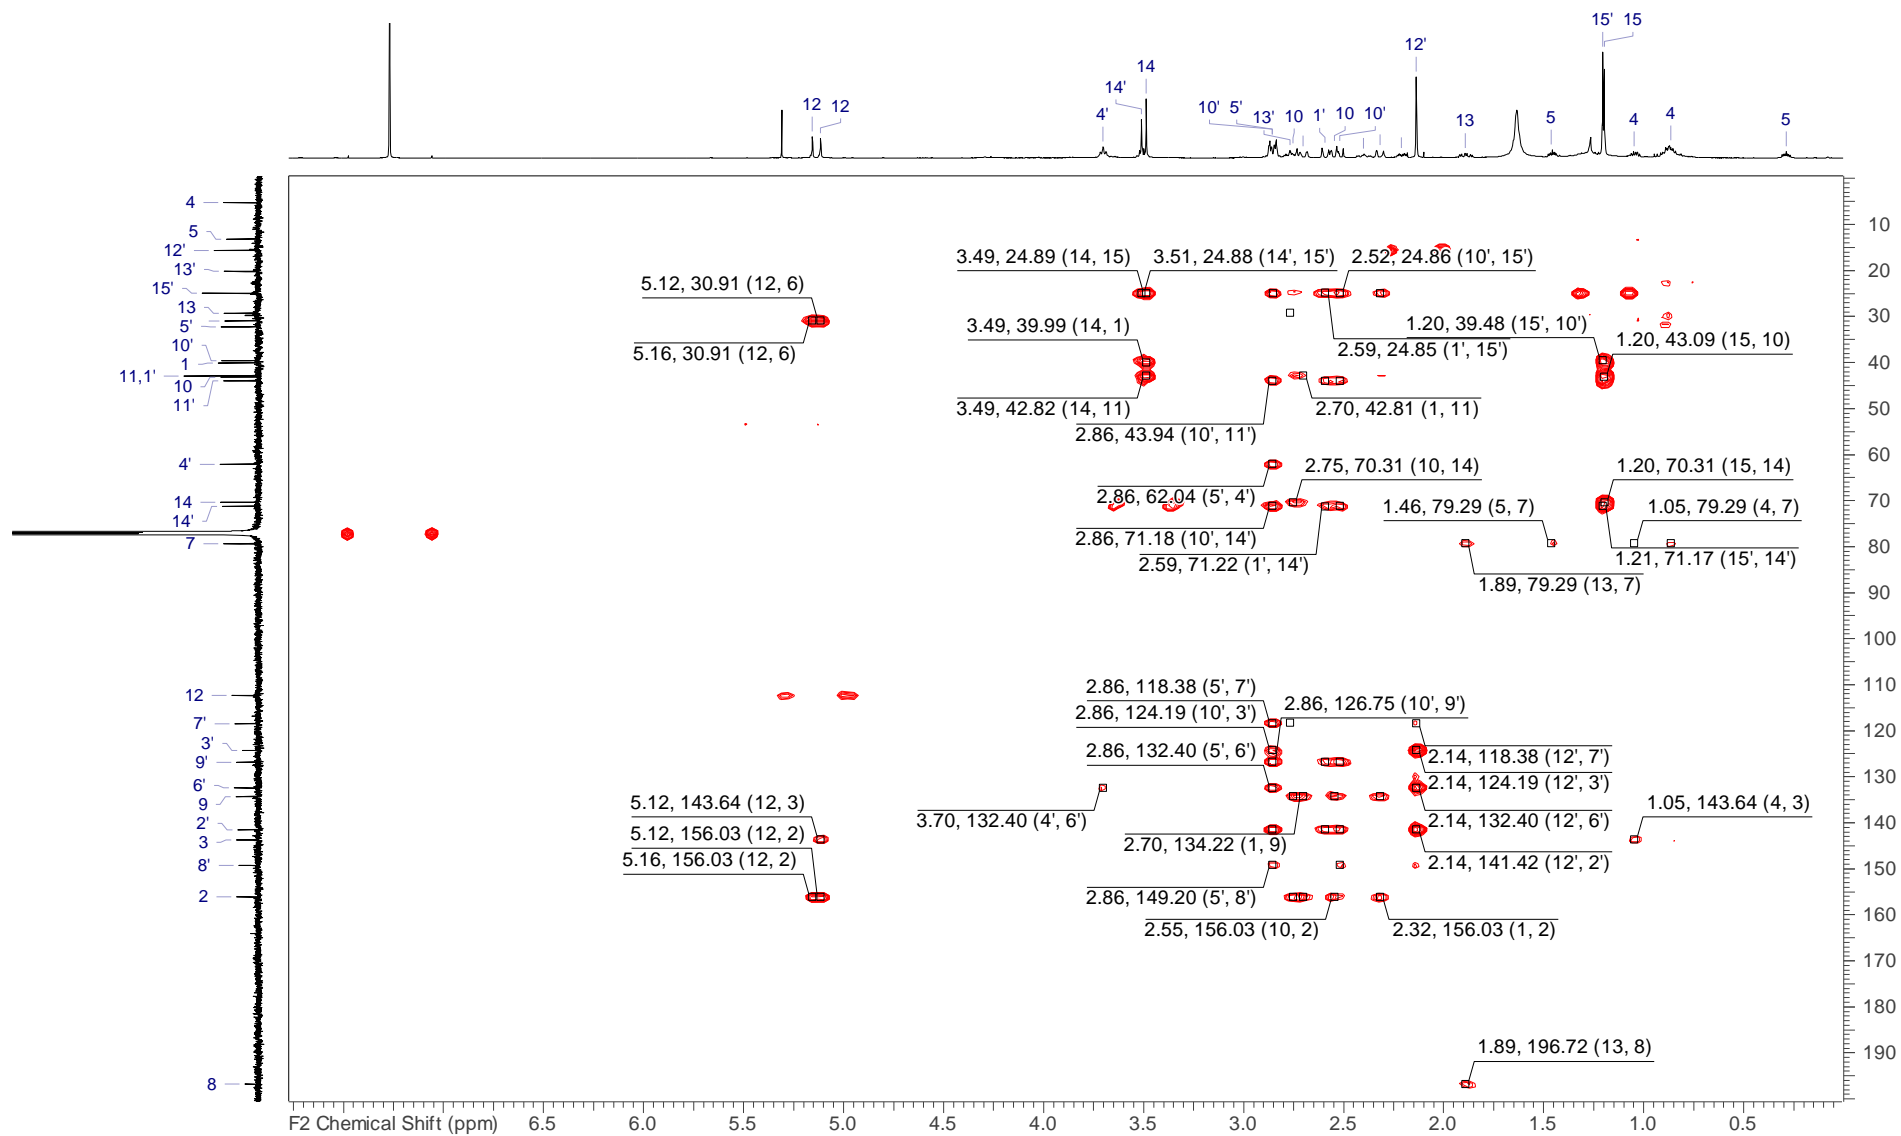

HMBC NMR spectrum of **2** (700 MHz,  $\text{CDCl}_3$ ).

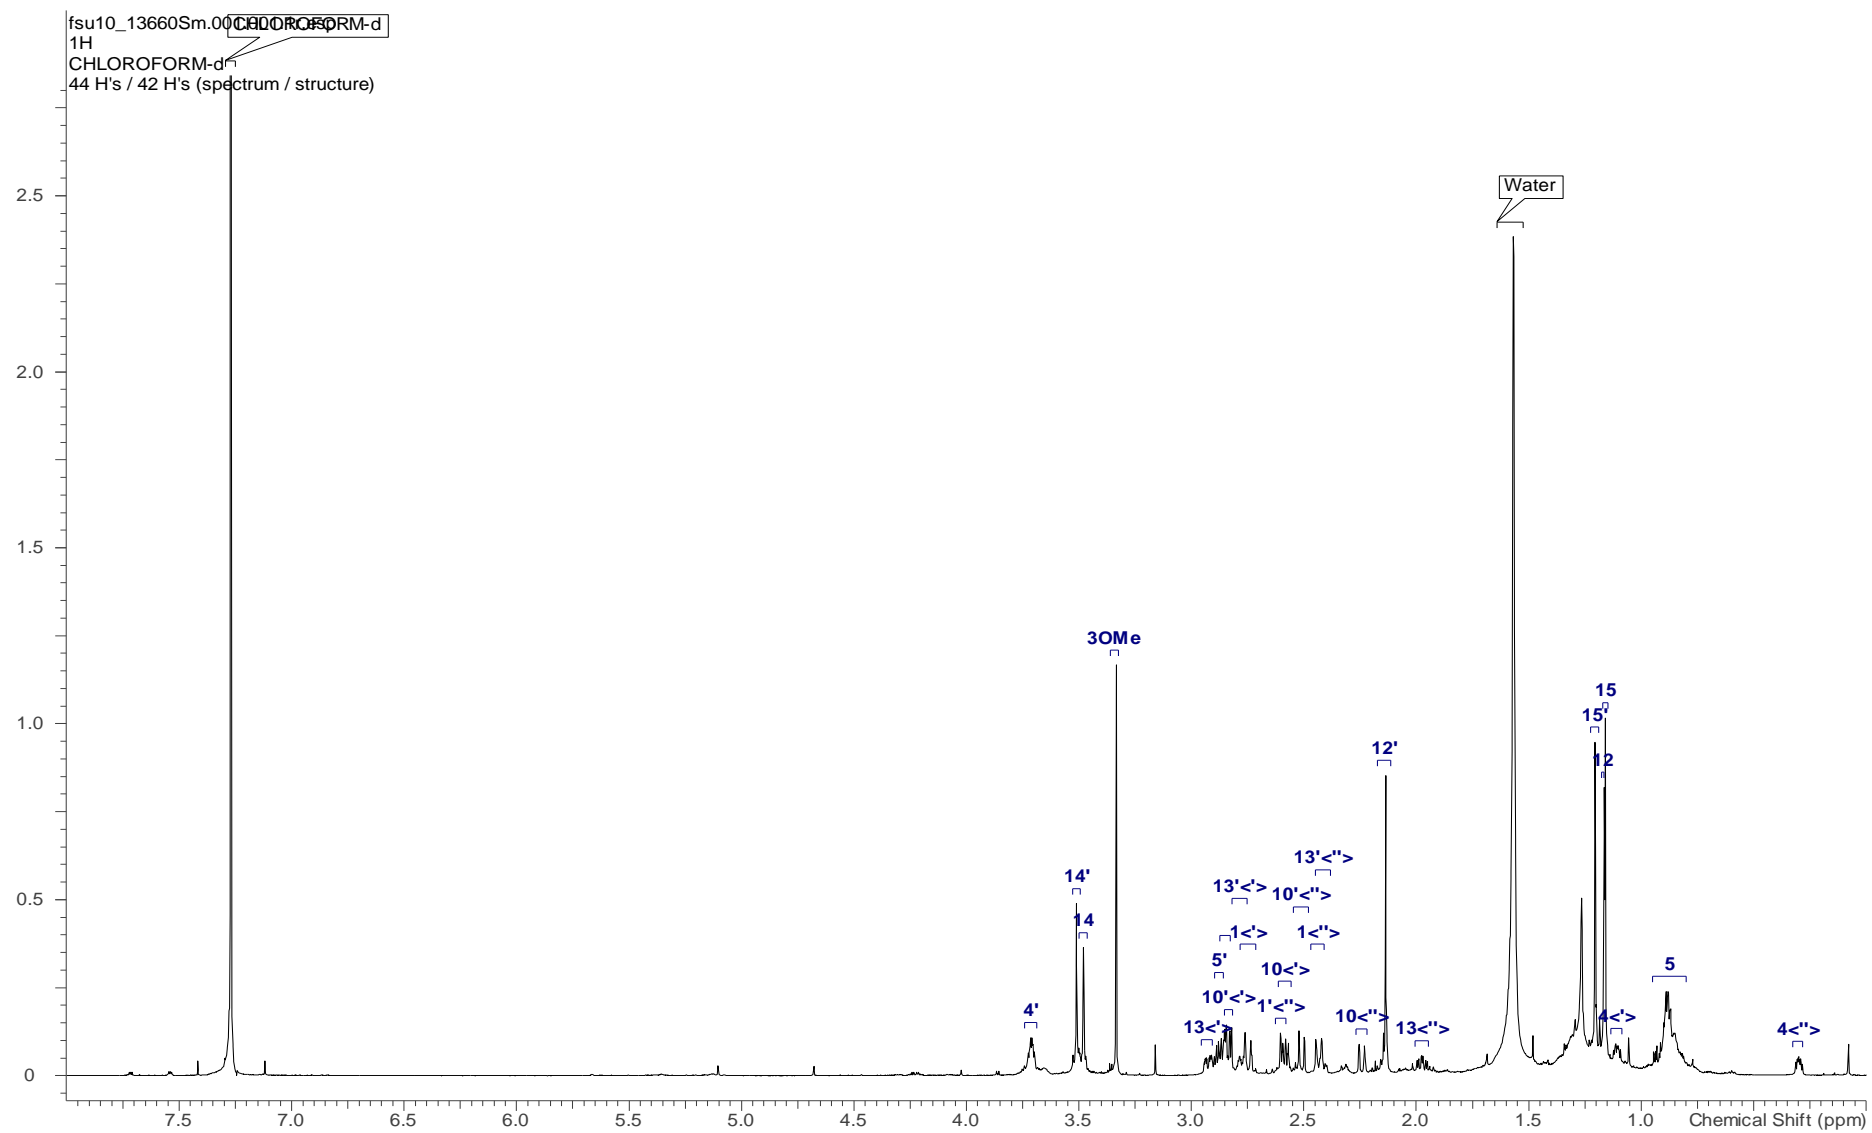

$^1\text{H}$  NMR spectrum of **3** (700 MHz,  $\text{CDCl}_3$ ).

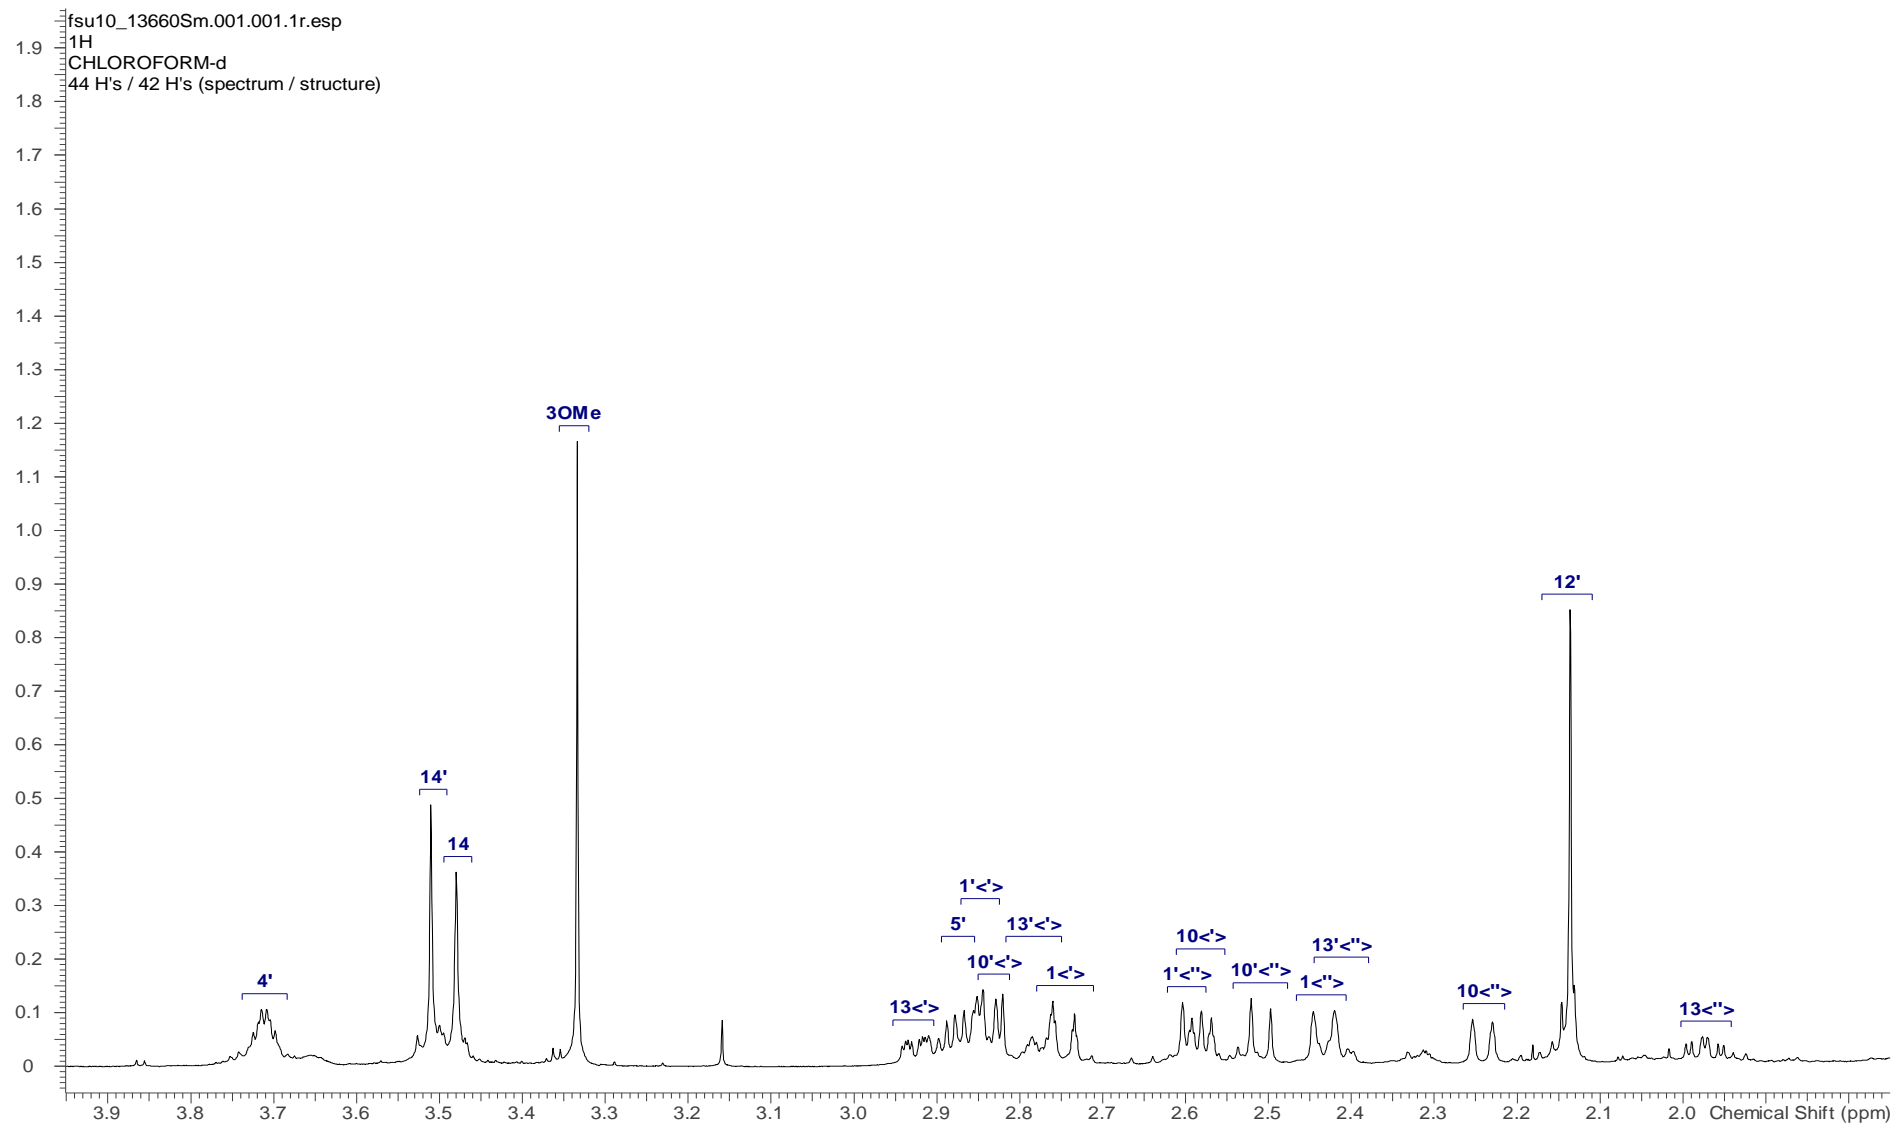

Section from  $^1\text{H}$  NMR spectrum of **3** (700 MHz,  $\text{CDCl}_3$ ).

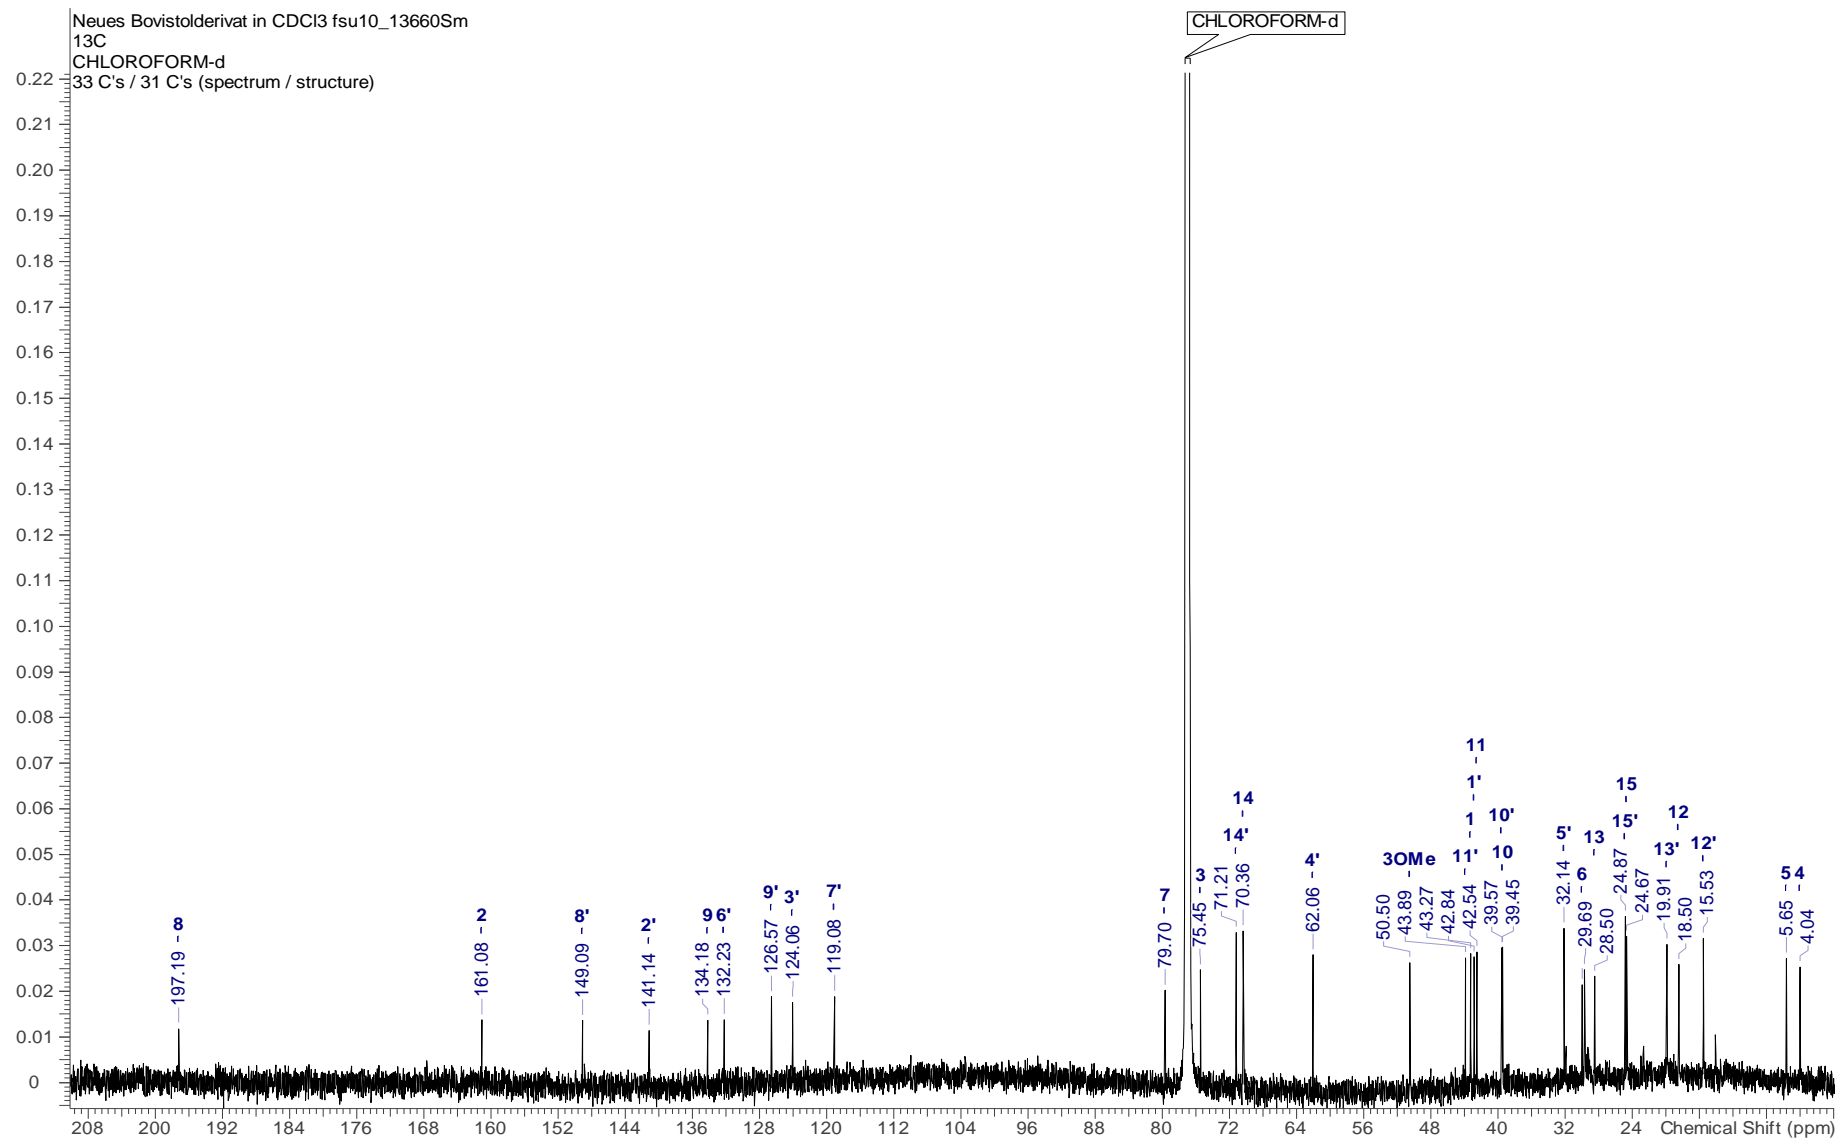

<sup>13</sup>C NMR spectrum of **3** (175 MHz, CDCl<sub>3</sub>).

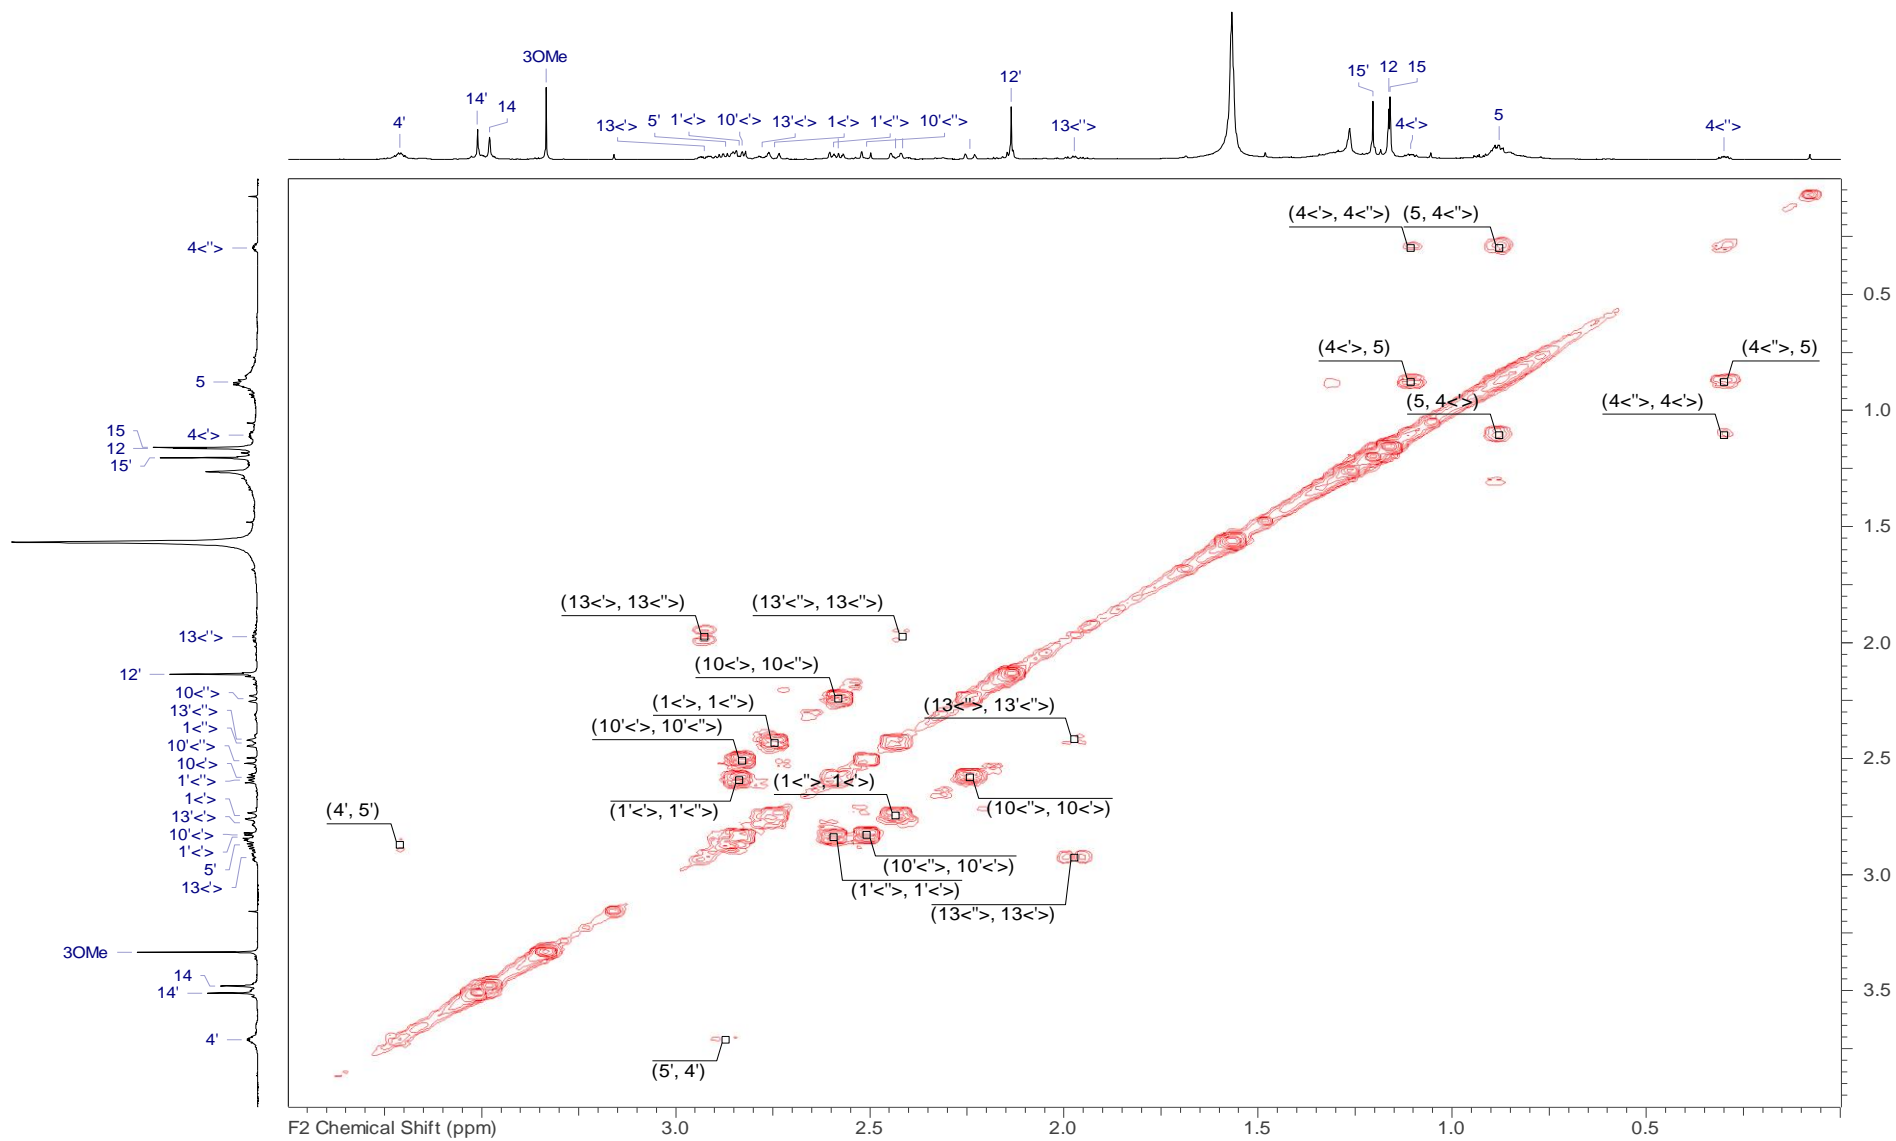

COSY NMR spectrum of **3** (700 MHz, CDCl<sub>3</sub>).

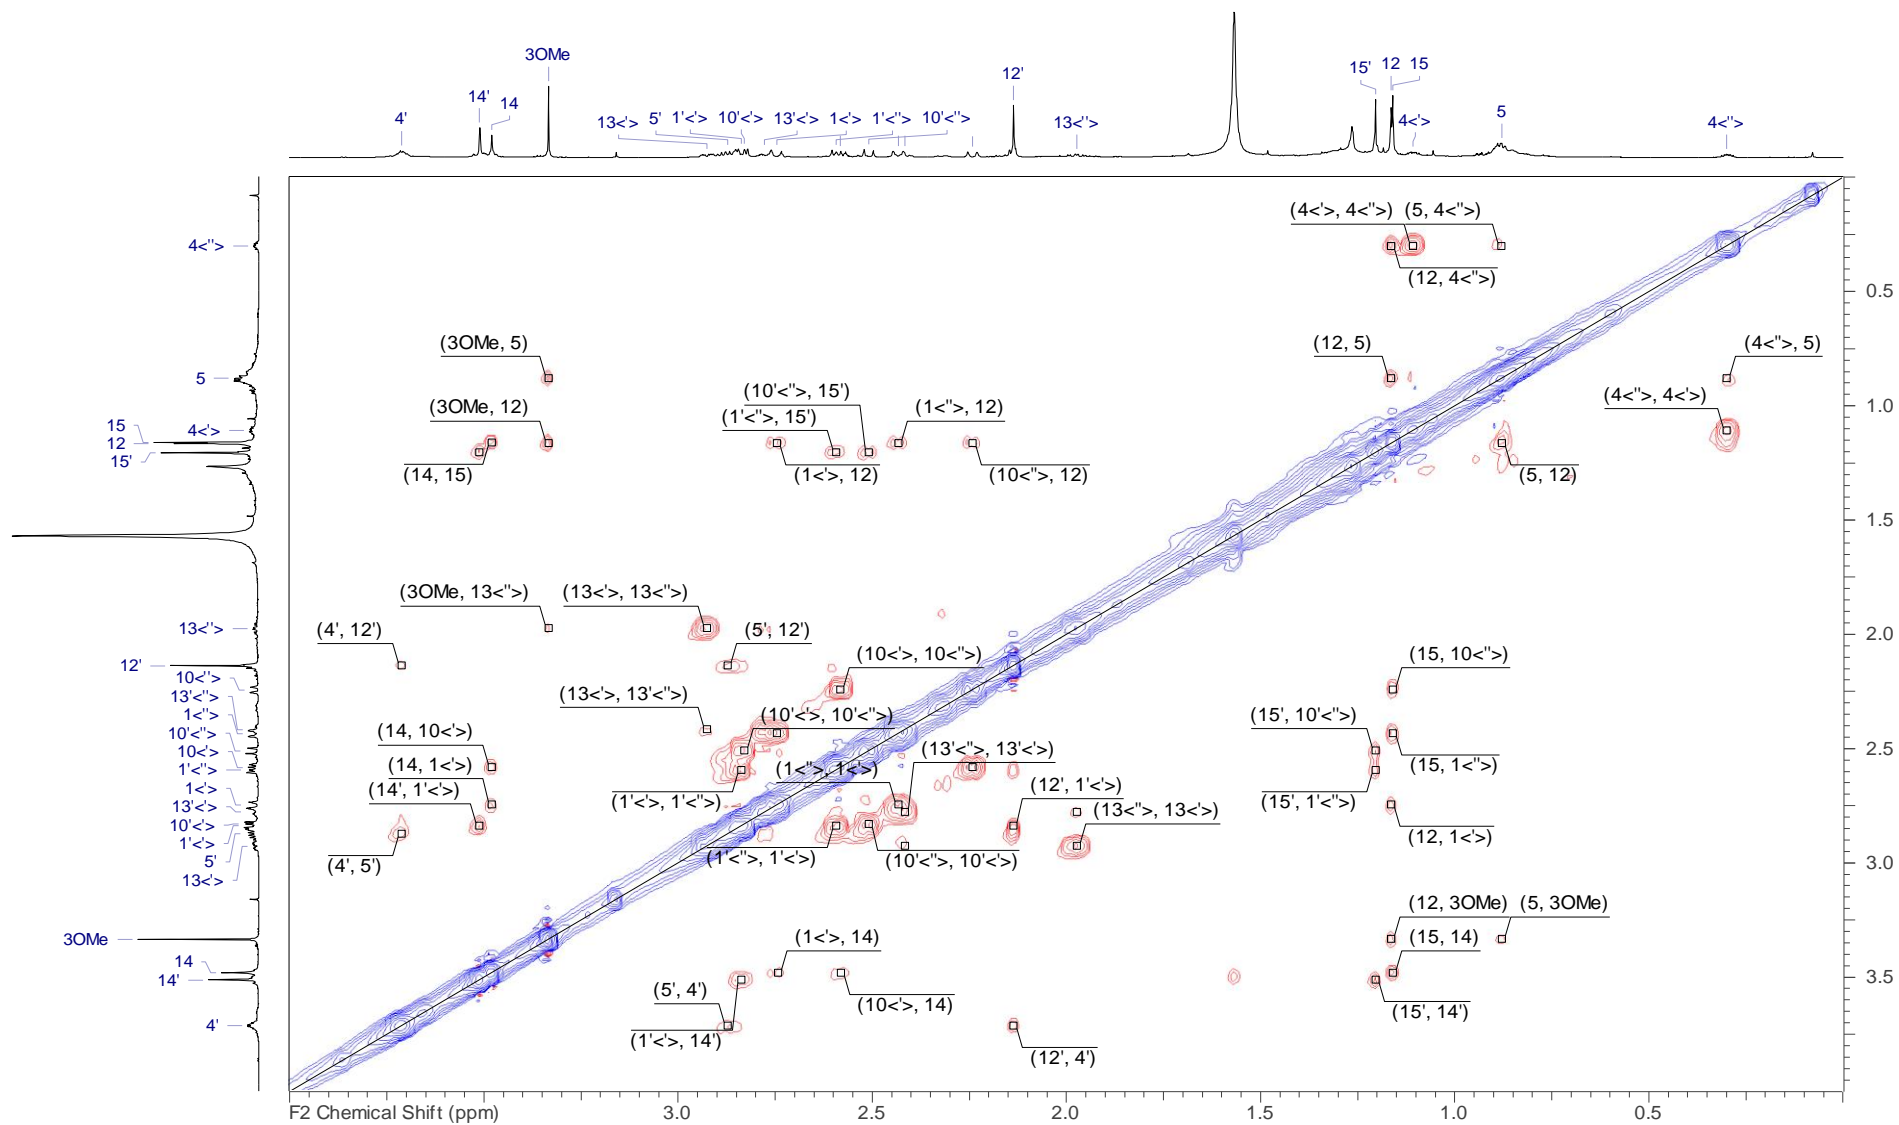

ROESY NMR spectrum of **3** (700 MHz, CDCl<sub>3</sub>).

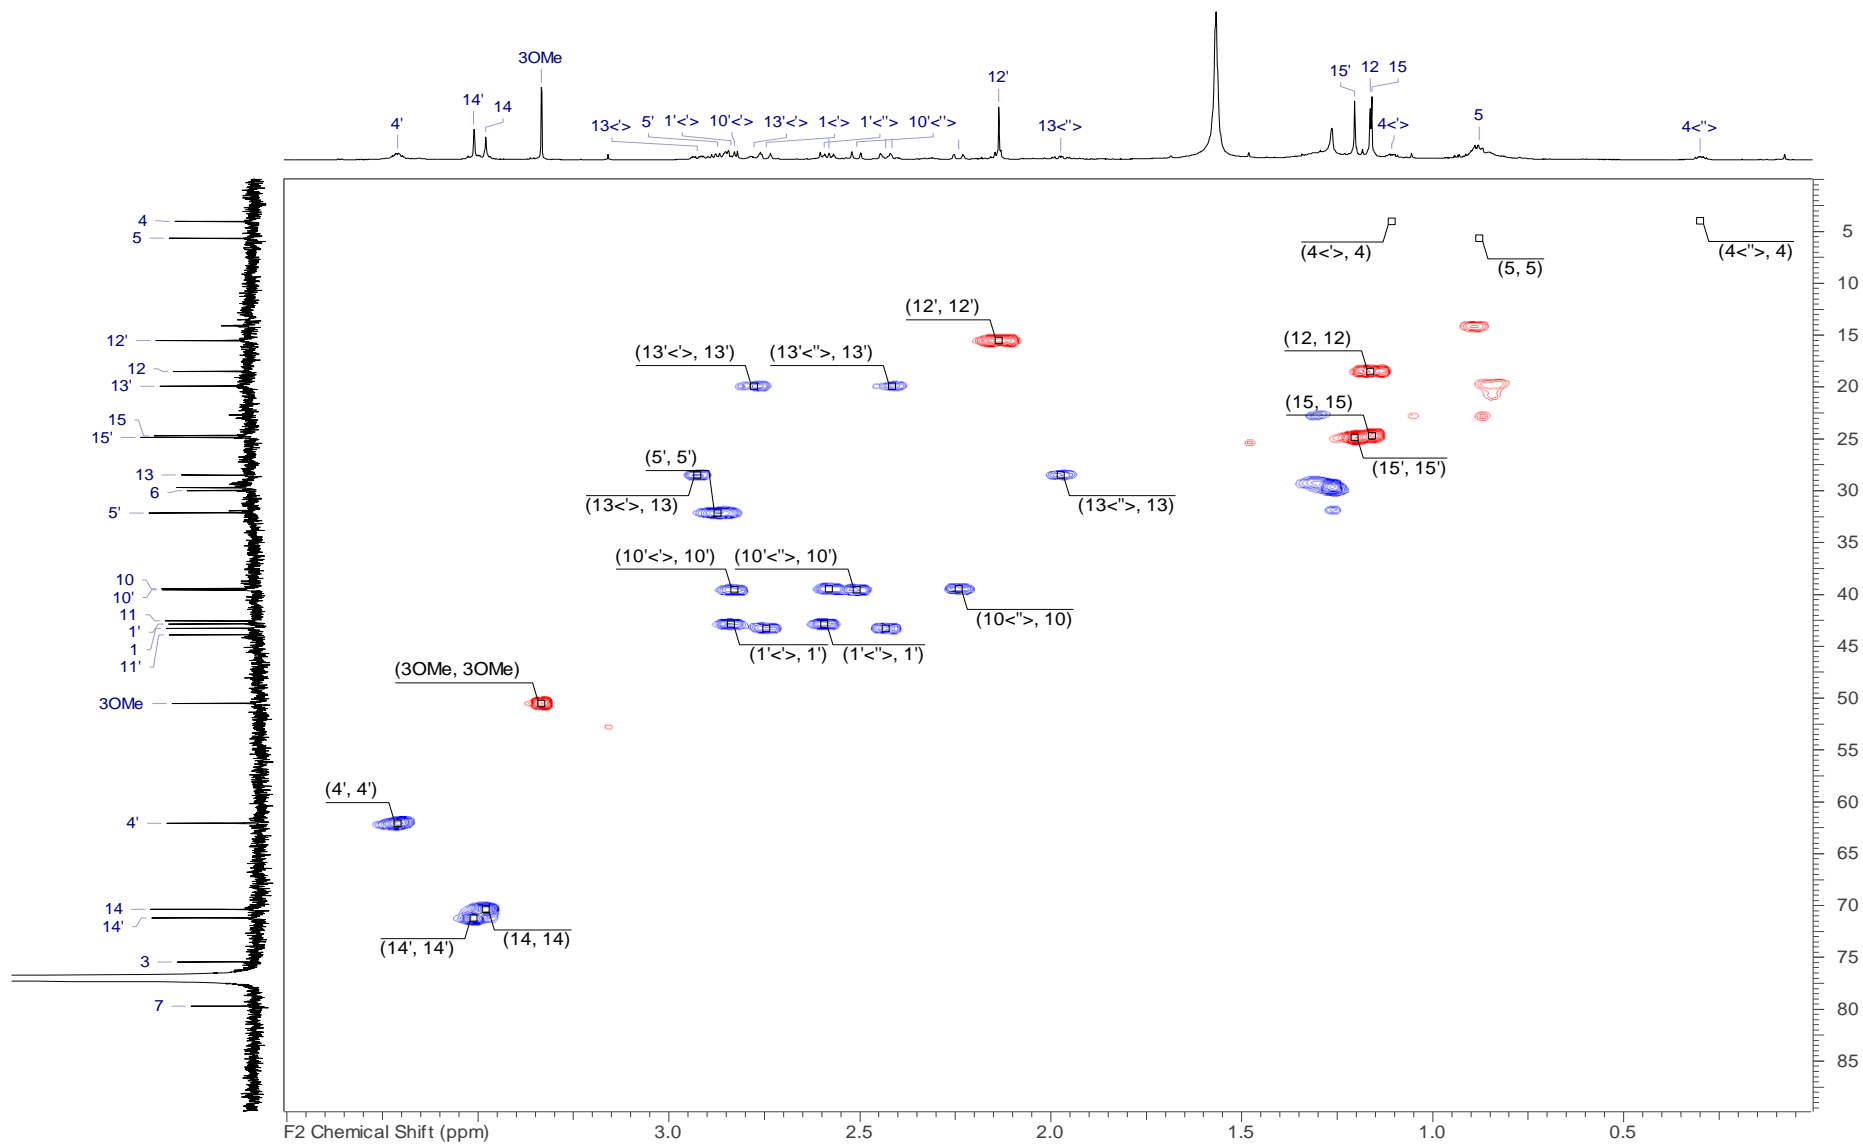

ROESY NMR spectrum of **3** (700 MHz, CDCl<sub>3</sub>).



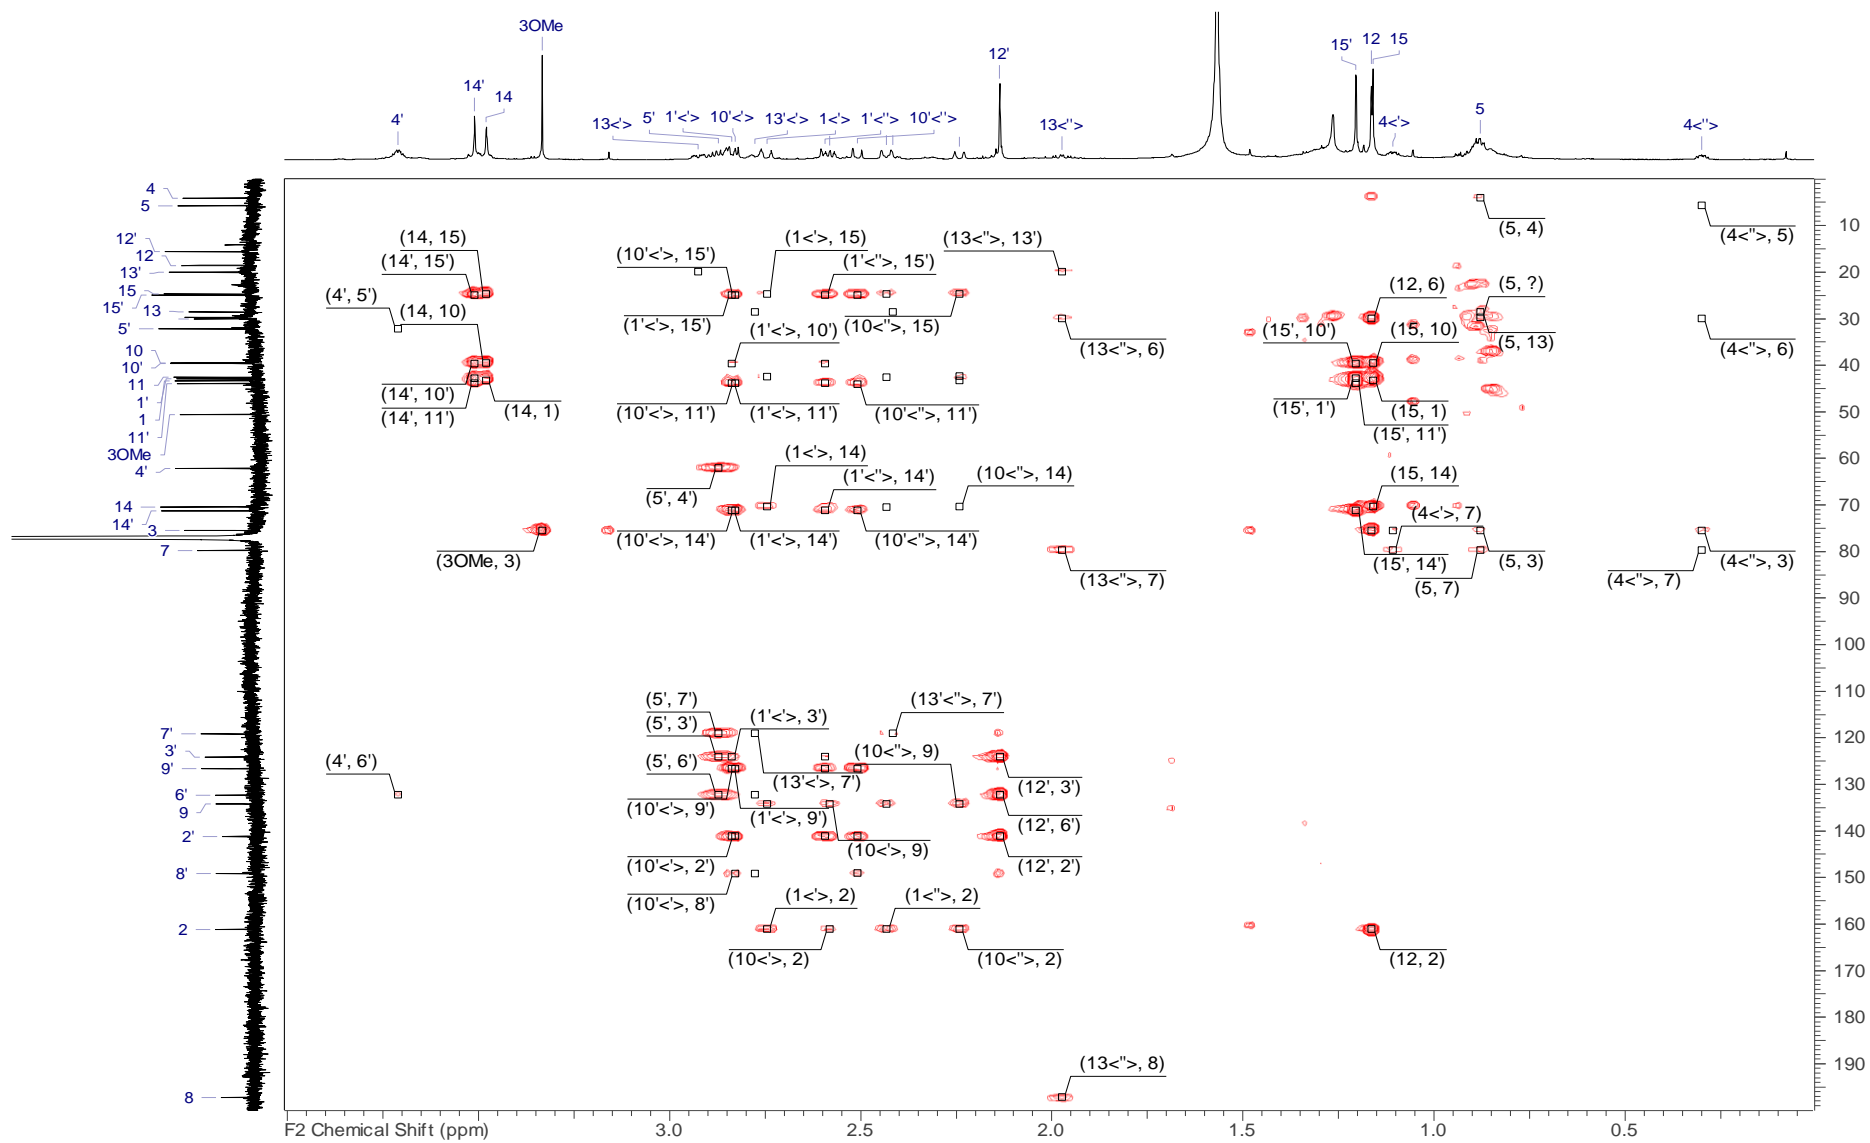

HMBC NMR spectrum of **3** (700 MHz, CDCl<sub>3</sub>).

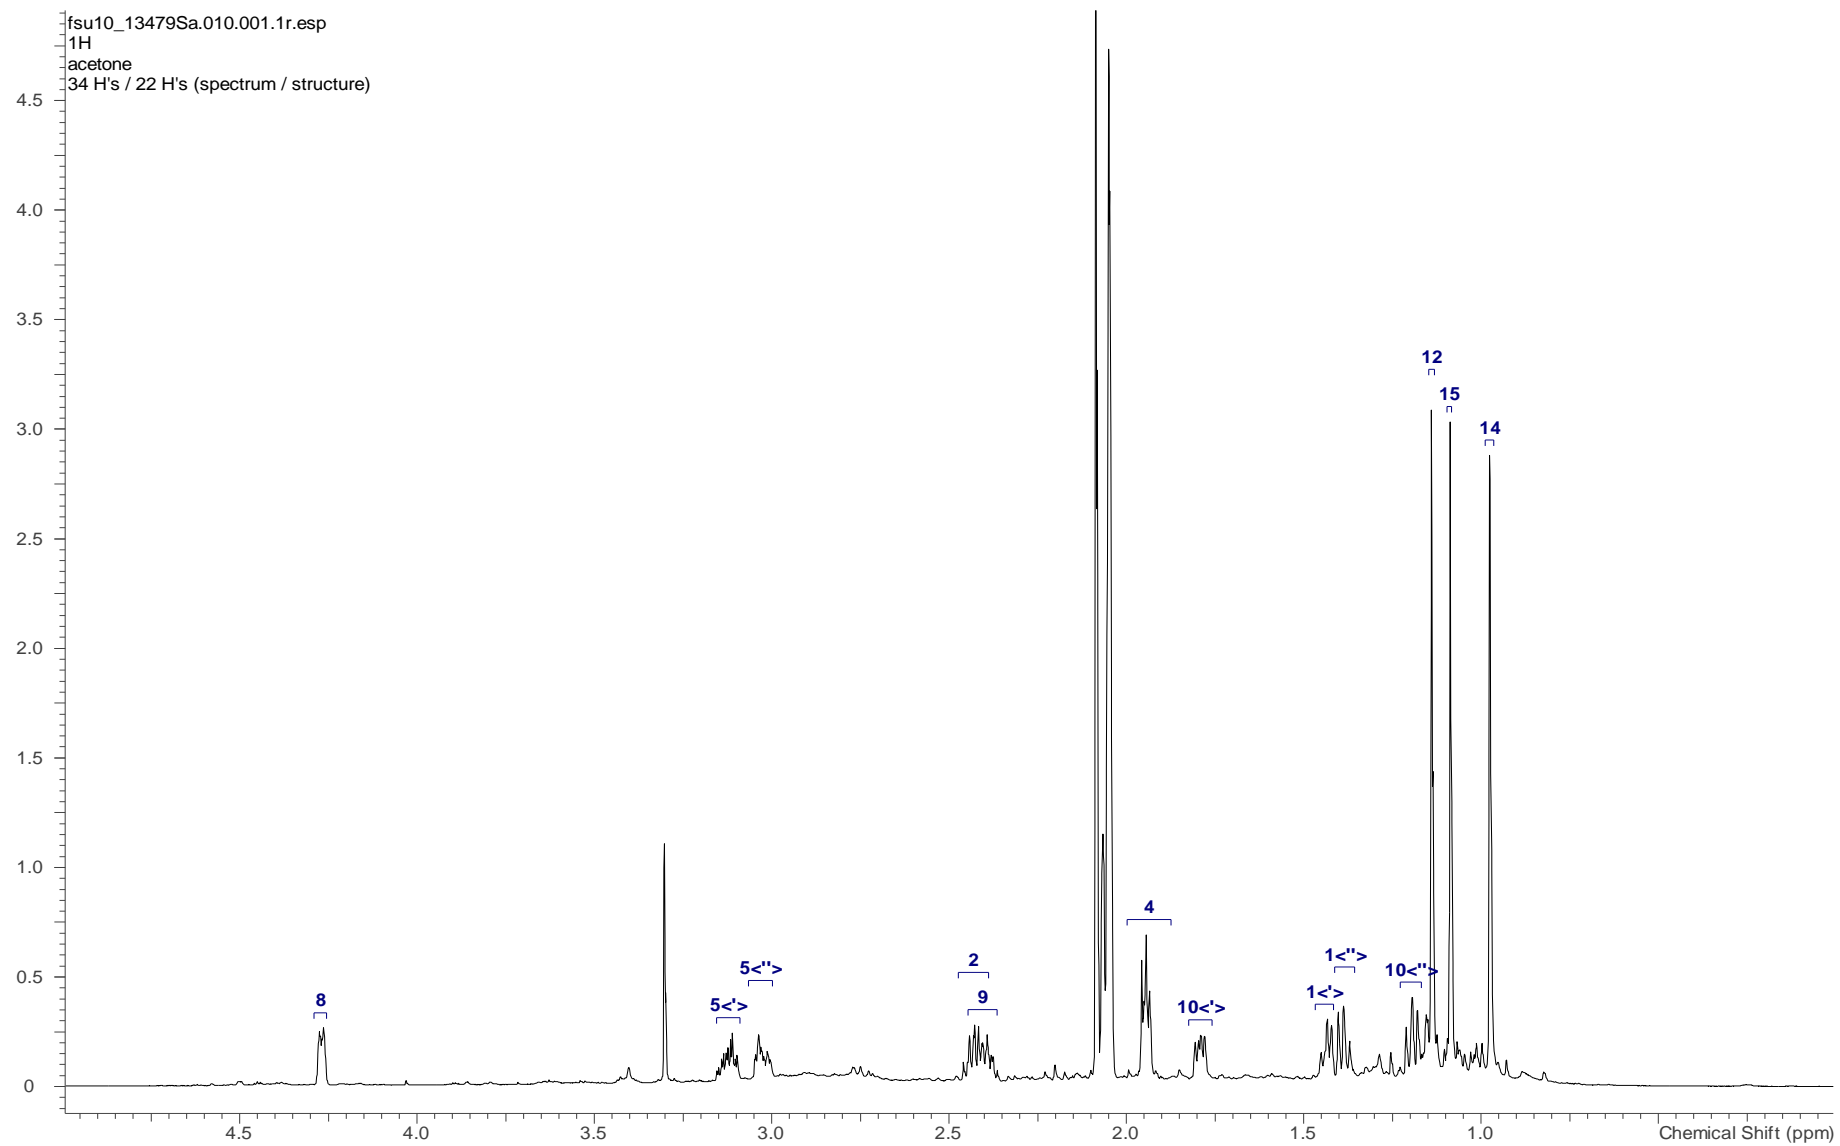

$^1\text{H}$  NMR spectrum of **4** (700 MHz, acetone- $d_6$ ).

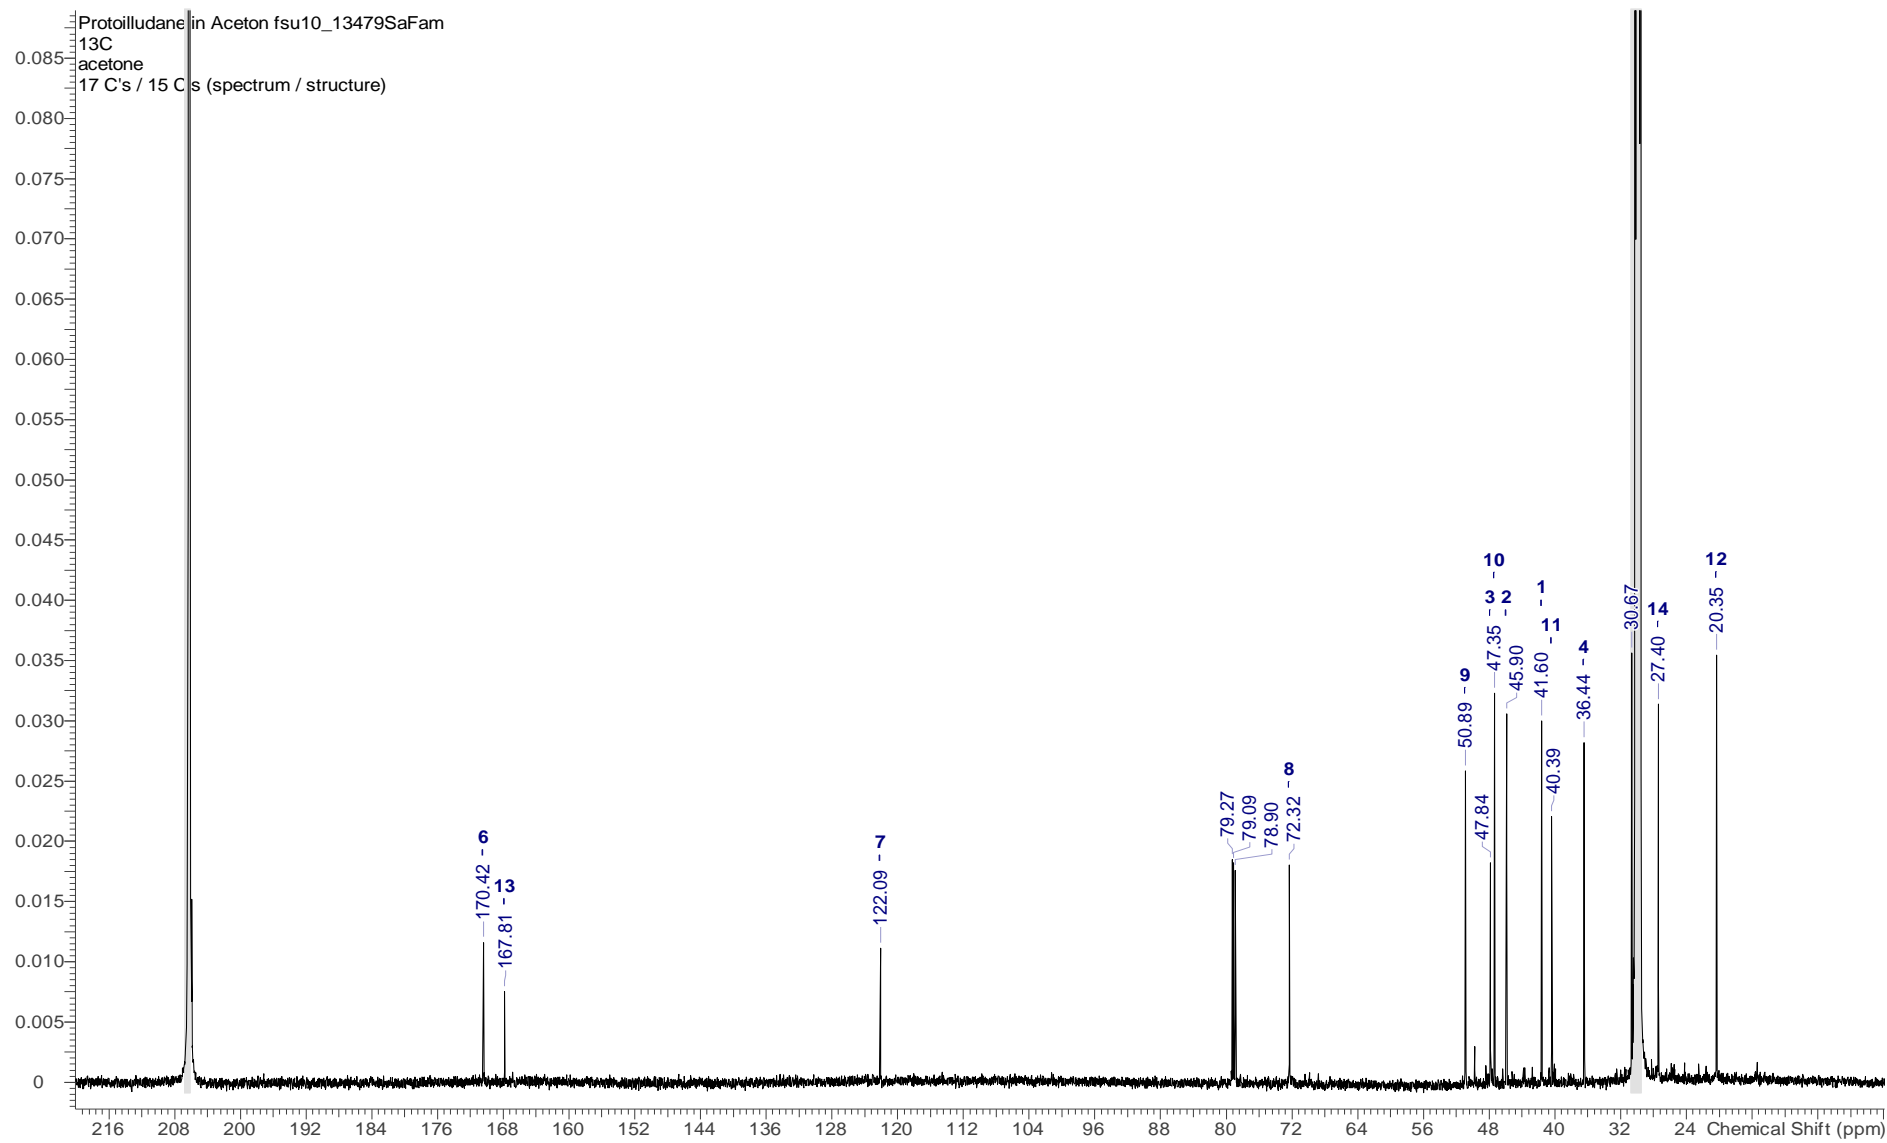

<sup>13</sup>C NMR spectrum of **4** (175 MHz, acetone-*d*<sub>6</sub>).

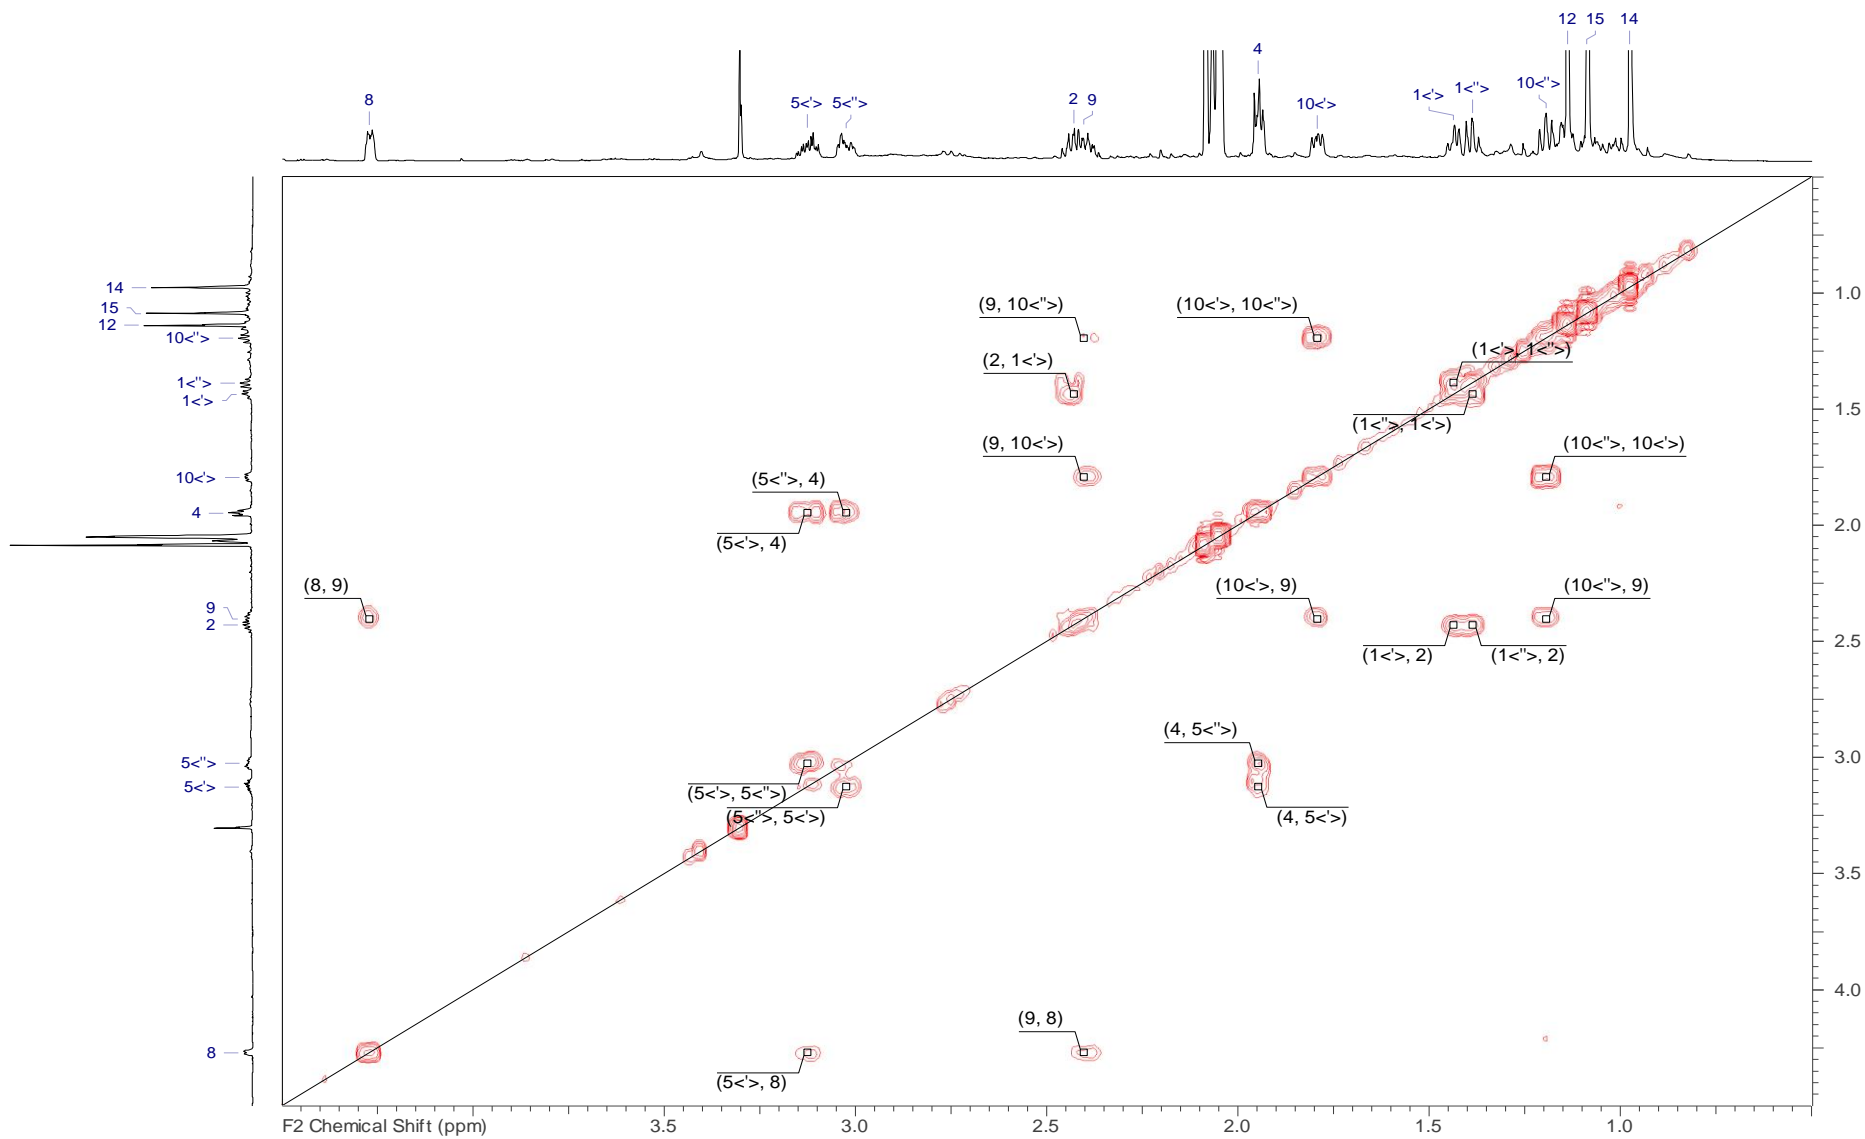

COSY NMR spectrum of **4** (700 MHz, acetone- $d_6$ ).

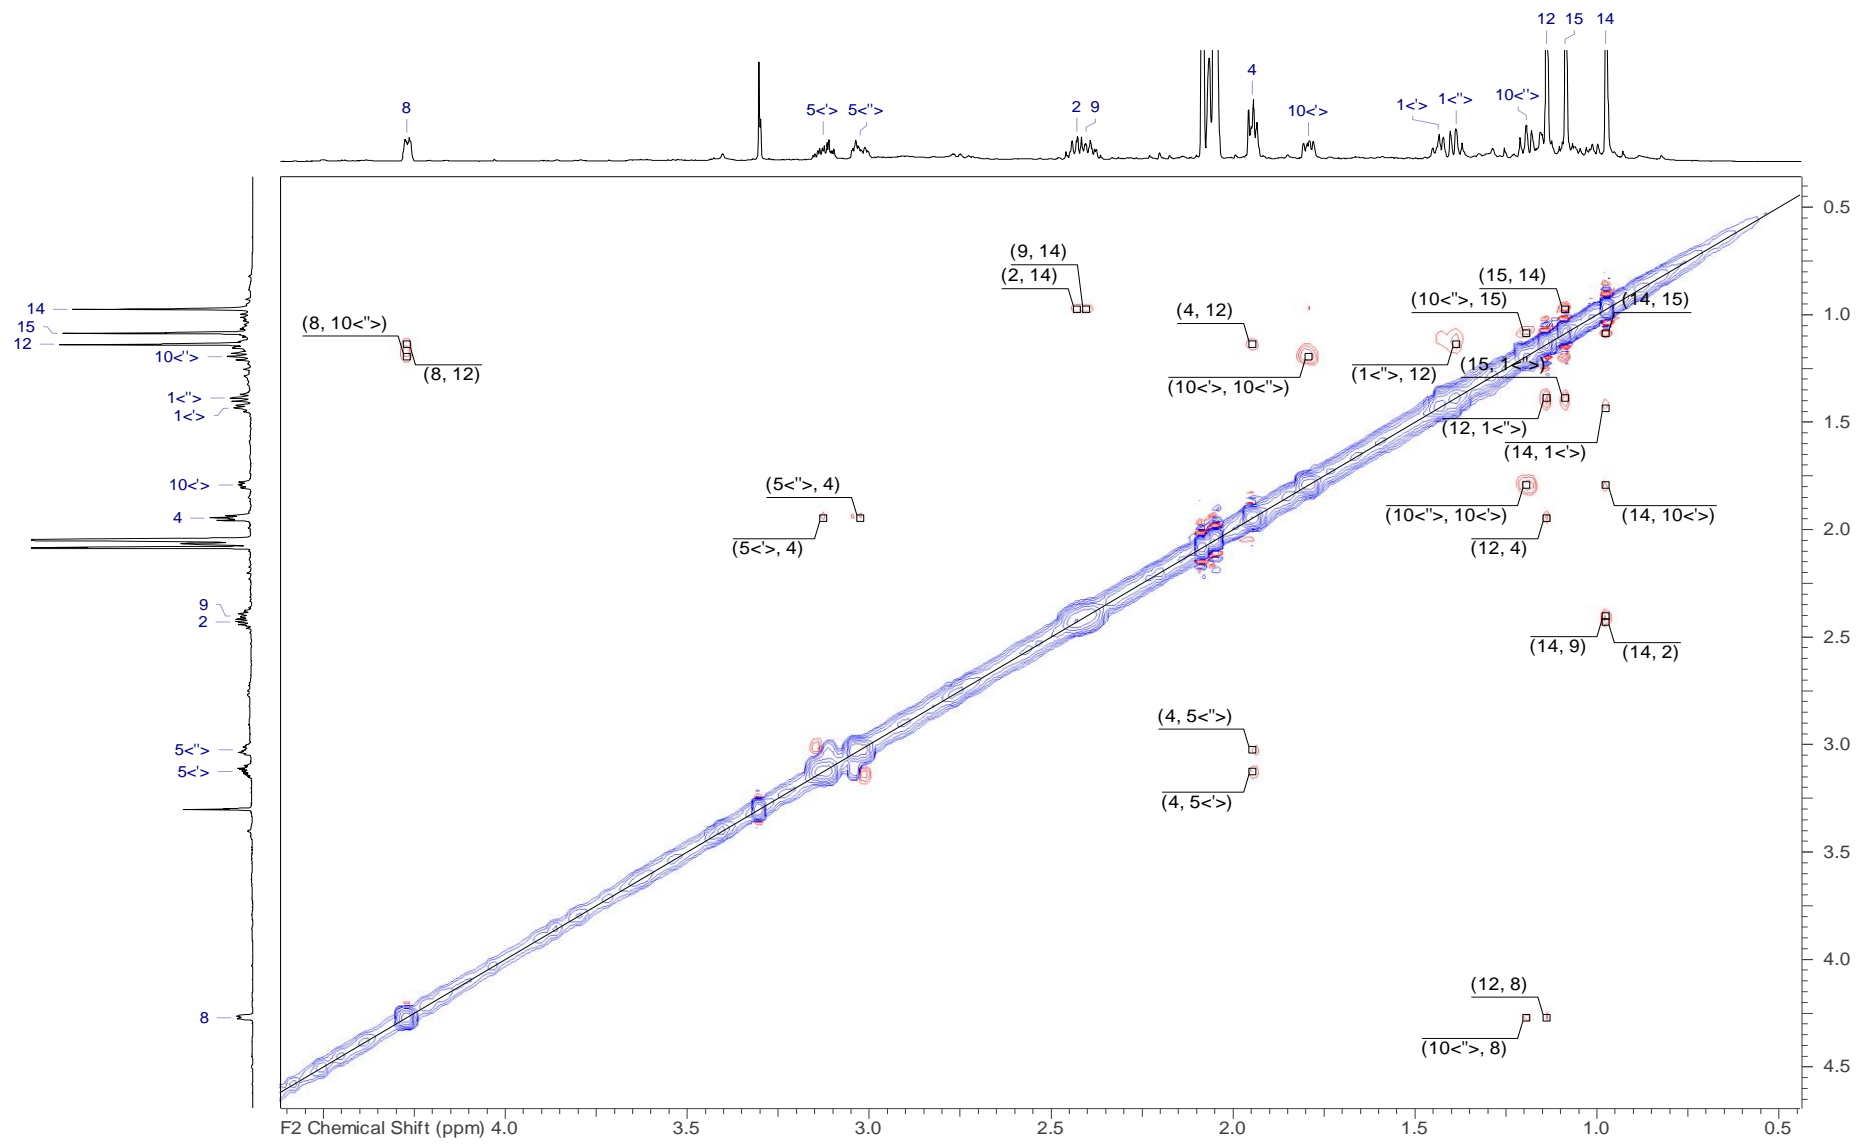

ROESY NMR spectrum of **4** (700 MHz, acetone-*d*<sub>6</sub>).

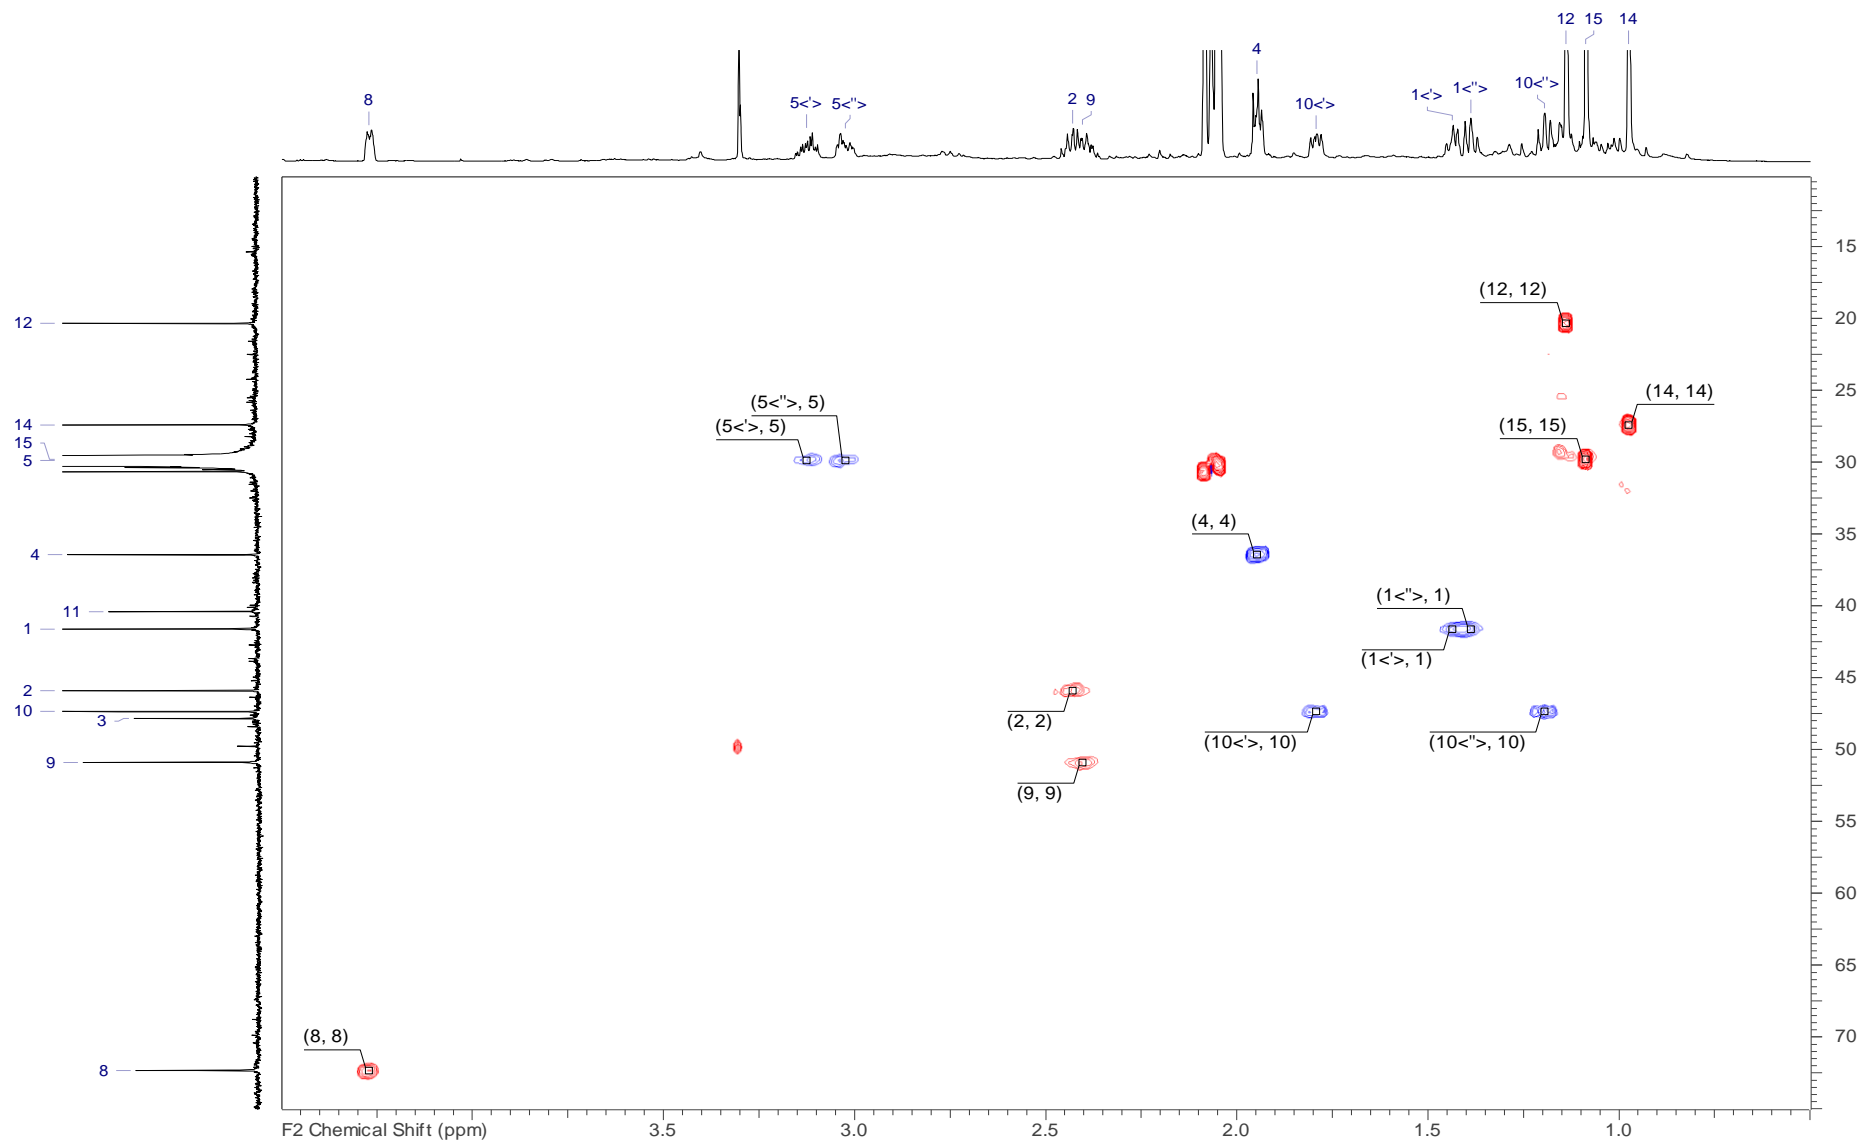

HSQC NMR spectrum of **4** (700 MHz, acetone-*d*<sub>6</sub>).

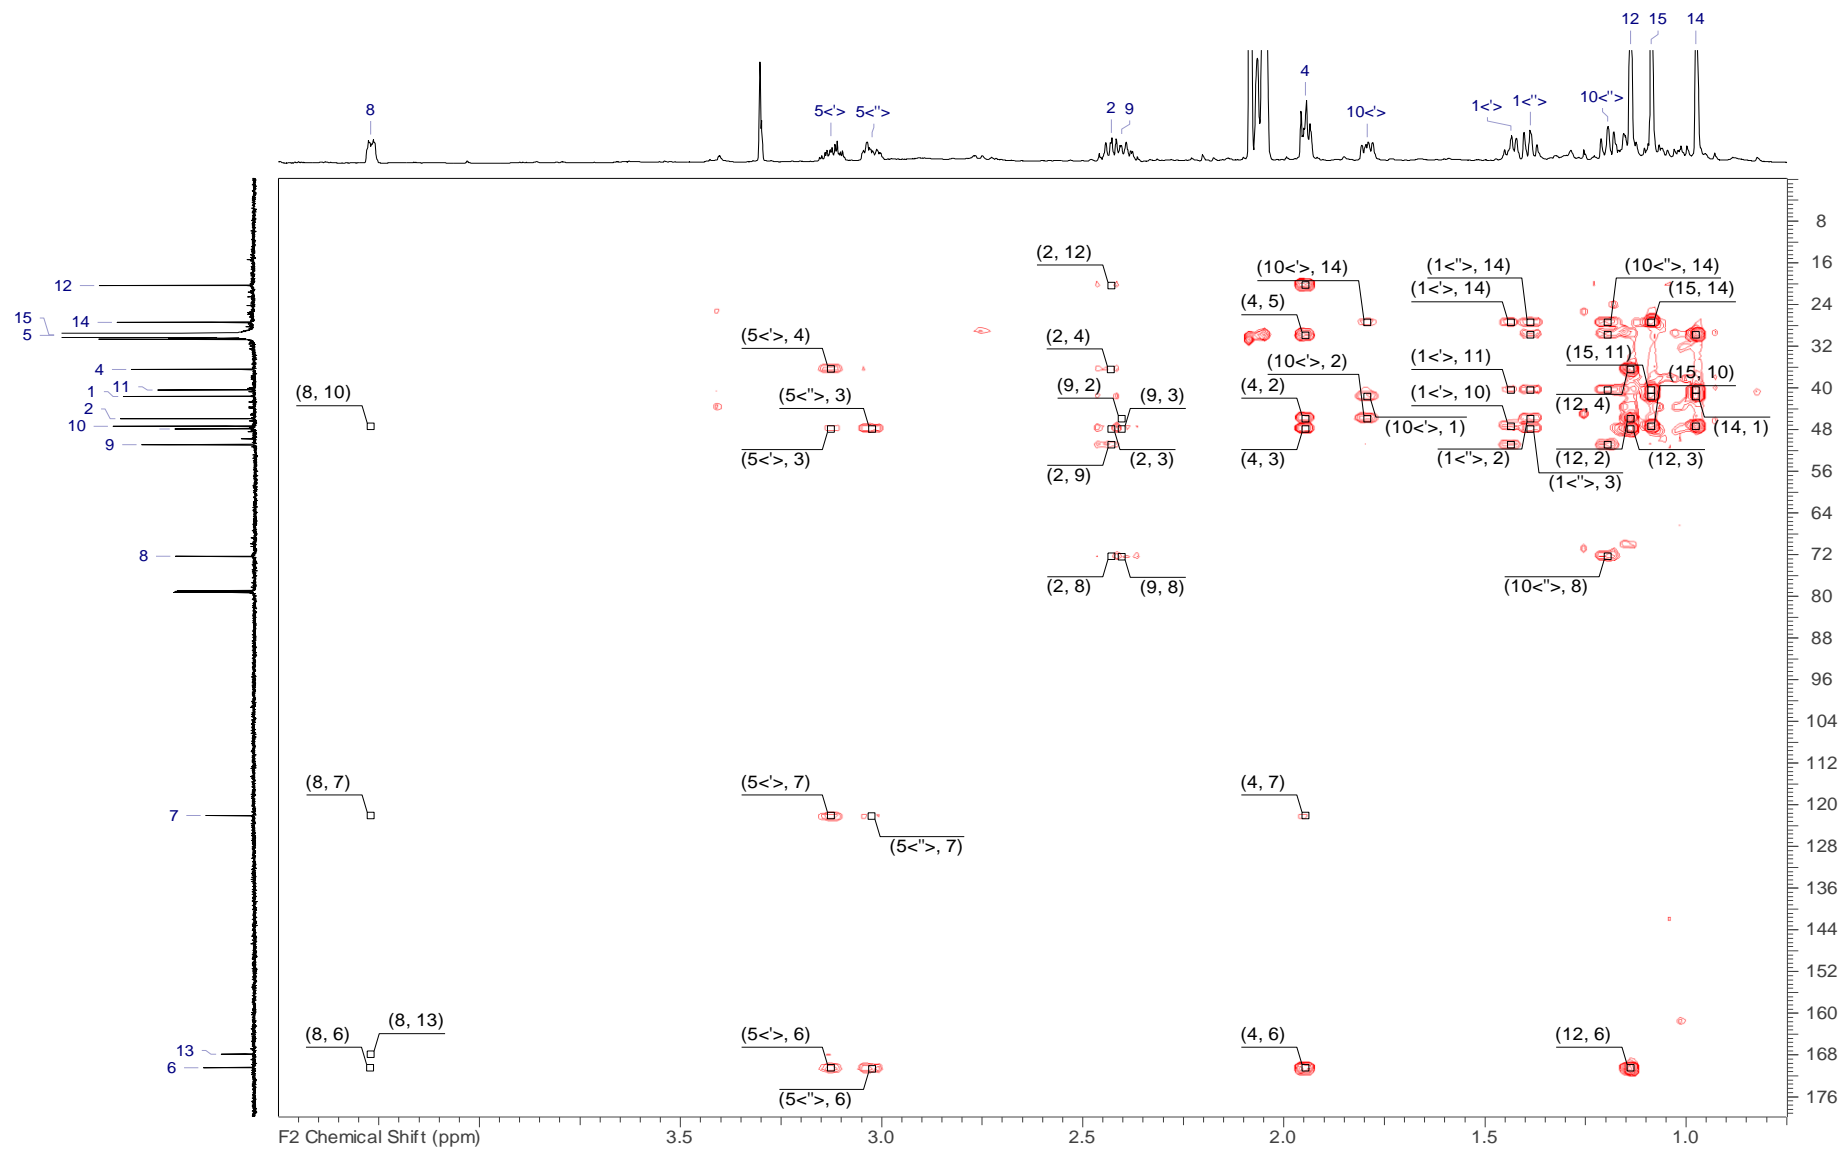

HMBC NMR spectrum of **4** (700 MHz, acetone- $d_6$ ).
